# Supplementary material for: Motor Evoked Potential Warning Criteria in Supratentorial Surgery: A Scoping Review
Source: MDPI journal article supplement (doi:10.3390/cancers13112803), 2021-06-04
Supplement: s1 [file s1]

# Supplementary Material

**Supplementary Table S1:** Definitions of true positive (TP), false positive (FP), false negative (FN), and true negative (TN) outcomes across the four different DTA sub-analyses.

|                                               | <b>True Positive(TP)</b>                                  | <b>False Positive(FP)</b>                                     | <b>False Negative(FN)</b>                                             | <b>True Negative(TN)</b>                                                  |
|-----------------------------------------------|-----------------------------------------------------------|---------------------------------------------------------------|-----------------------------------------------------------------------|---------------------------------------------------------------------------|
| <b>Early-Transient Motor Deficit Analysis</b> | Irreversible MEP change and early-transient motor deficit | Irreversible MEP change without early-transient motor deficit | Reversible MEP change/no MEP change and early-transient motor deficit | Reversible MEP change/no MEP change without early-transient motor deficit |
| <b>Transient Motor Deficit Analysis</b>       | Irreversible MEP change and transient motor deficit       | Irreversible MEP change without transient motor deficit       | Reversible MEP change/no MEP change and transient motor deficit       | Reversible MEP change/no MEP change without transient motor deficit       |
| <b>Permanent Motor Deficit Analysis</b>       | Irreversible MEP change and permanent motor deficit       | Irreversible MEP change without permanent motor deficit       | Reversible MEP change/no MEP change and permanent motor deficit       | Reversible MEP change/no MEP change without permanent motor deficit       |
| <b>All Motor Deficits Analysis</b>            | Irreversible MEP change and motor deficit                 | Irreversible MEP change without any motor deficit             | Reversible MEP change/no MEP change and motor deficit                 | Reversible MEP change/no MEP change without any motor deficit             |

**Supplementary Table S2: Patient characteristics, neuromonitoring settings and interventions**

| Authors                               | Type of lesion<br>(Age of patients)                                                                                               | Stimulation Parameters                                                                                                    | Recorded Muscles                                                                         | Intervention after<br>warning                                                                                                                                                                 |
|---------------------------------------|-----------------------------------------------------------------------------------------------------------------------------------|---------------------------------------------------------------------------------------------------------------------------|------------------------------------------------------------------------------------------|-----------------------------------------------------------------------------------------------------------------------------------------------------------------------------------------------|
| <b>TUMORS AND OTHER BRAIN LESIONS</b> |                                                                                                                                   |                                                                                                                           |                                                                                          |                                                                                                                                                                                               |
| Giampiccolo et al.(2021)              | glioma (low/high grade)<br>cavernoma<br>ependymoma<br>metastasis<br>meningioma<br>lymphoma<br>DNET<br><br>(mean age =49y, SD =15) | -DCS<br>- Multi-train<br>(p=5, ISI=2ms, pd=0.5 ms)                                                                        | APB,ED, QUAD,AH,TA                                                                       | N/A                                                                                                                                                                                           |
| Gogos et al.(2020)                    | glioma<br>ependymoma<br><br>(17-81y)                                                                                              | -DCS & TES<br>-m/bDsCS<br>-Multi-train<br>(p=0-9, pd=0.05-0.5 ms, ISI= 1-4 ms, si/TES=0–200 V,si/DCS=0-20mA,si/DsCS≤20mA) | Contralateral:<br>face, upper arm, forearm, hand, upper leg, lower leg, and foot muscles | Halt of resection                                                                                                                                                                             |
| Mammadkhanli et al. (2020)            | glioma (low/high grade)<br>metastasis<br>cavernoma<br>meningioma<br>AVM                                                           | -DCS<br>-Multi-train<br>(p=5, f=500 Hz, pd=0.3 ms, si=180V)                                                               | N/A                                                                                      | -Halt of resection and waiting for 10 minutes<br>-60 Hz interference control<br>-Steroid                                                                                                      |
| Seidel et al.(2020)                   | glioma<br>metastasis<br>vascular lesions<br><br>(mean age =48y, SD =15)                                                           | -DCS<br>- mDsCS<br>- Multi-train<br>(p=5, pd=0.5 ms ,f=250 Hz, ISI=4 ms,si/DsCS≤20mA)                                     | Contralateral:<br>face, distal and proximal upper and lower limbs                        | -Halt of resection(stop of resection if ≥15 min MEP change)<br>-Ruling out technical confounders<br>-Normalizing anesthesia<br>-Increase of CPP<br>-Nimodipine<br>-Removal of brain retractor |
| Abboud et al.(2019)                   | unilateral supratentorial lesions not involving the PMC<br><br>(mean age =52y, SD =16)                                            | -TES<br>- Multi-train<br>(p=5, ISI=2ms, pd=0.5 ms, si≤400V)                                                               | Bilateral:<br>APB,TA,OO                                                                  | -Halt of resection(stop of resection if ≥15 min MEP change)<br>-Warm irrigation<br>-Reposition of brain retractor                                                                             |

|                          |                                                                                                      |                                                                                                                 |                                                                                                                      |                                                                                                                                                                               |
|--------------------------|------------------------------------------------------------------------------------------------------|-----------------------------------------------------------------------------------------------------------------|----------------------------------------------------------------------------------------------------------------------|-------------------------------------------------------------------------------------------------------------------------------------------------------------------------------|
| Majchrzak et al.(2018)   | thalamic tumors<br><br>(20–65y,mean age=37y)                                                         | -TES<br>- Multi-train<br>(p=4-6, ISI=3–4 ms, pd=0.5 ms, si≤220 mA)                                              | -Contralateral: thenar,hypothenar, triceps surae,TA<br><br>-Ipsilateral thenar (negative control)                    | N/A                                                                                                                                                                           |
| Moiyadi et al.(2018)     | glioma (low/high grade) metastasis<br>ependymoma<br>embryonal tumors<br><br>(3-70y, mean age =38.3y) | -DCS &TES<br>-mDsCS<br>-TES(Multi-train, p= 5, ISI=3ms, pd=0.5ms)<br>-DCS(Multi-train, p= 4, ISI=4ms, pd=0.5ms) | -Contralateral: FCR,APB,TA,EDB<br><br>-One ipsilateral muscle (negative control)                                     | -Halt of resection<br>-Ruling out hemodynamic, systemic and anesthetic factors and strip electrode displacement<br>-Release of brain retraction<br>-Warm irrigation(5-10 min) |
| Plans et al.(2017)       | glioma<br><br>(17–73 y, mean age =47.29 y)                                                           | -DCS<br>-mDsCS<br>- Multi-train (p=5, ISI=4ms, pd=0.5ms, si/DCS≤25mA, si/DsCS≤25mA)                             | Bilateral: APB,ED,AH,TA                                                                                              | -Halt of resection<br>-Ruling out strip electrode displacement<br>-Increase of BP<br>-Papaverine<br>-Warm irrigation                                                          |
| Zhou et al.(2017)        | AVM<br><br>(6–76y,mean age= 34.9 y)                                                                  | -DCS &TES<br>- Multi-train<br>(p=3-5, ISI=1-5ms)                                                                | N/A                                                                                                                  | -Increase of BP<br>-Cooling<br>-Inducing burst suppression<br>-Removal of the clip or retractor                                                                               |
| Abboud et al.(2016)      | gliomas not involving the PMC<br><br>(25–81 y,mean age=56 y)                                         | -TES<br>- Multi-train<br>(p=5, ISI=2ms, pd=0.5 ms,si≤400V)                                                      | Bilateral: APB,TA,OO                                                                                                 | -Halt of resection<br>-Reposition of brain retractors<br>-Warm irrigation                                                                                                     |
| Boex et al.(2016)        | glioma<br>meningioma<br>metastasis<br>dysplasia<br><br>(1-79y,median age =53y)                       | -DCS &TES<br>- Multi-train<br>(p=5, f=350 Hz, ISI=2.9 ms, pd= 0.4ms, si/DCS≤ 12 mA, si/TES≤180 mA)              | -Contralateral: BB,FCR,thenar,lumbrical QUAD,TA,GAST, AH<br><br>-Ipsilateral hand and foot muscle (negative control) | -Halt of resection<br>-Verification of MEP decrease with a stimulation increase(max 5%)<br>-Imaging and neuronavigation reappraisal                                           |
| Obermueller et al.(2015) | glioma<br>metastasis                                                                                 | -DCS<br>- Multi-train<br>(p=5, f=350 Hz, pd=0.2-0.3 ms, si=6-30mA)                                              | -Contralateral: BB,FCR,APB,ADM,TA                                                                                    | -Halt of resection<br>-Removal of spatulas<br>-Irrigation(warm Ringer's solution or nimodipine)                                                                               |

|                     |                                                                                                                   |                                                                                                                             |                                                                   |                                                                                                                             |
|---------------------|-------------------------------------------------------------------------------------------------------------------|-----------------------------------------------------------------------------------------------------------------------------|-------------------------------------------------------------------|-----------------------------------------------------------------------------------------------------------------------------|
|                     | (glioma:16-84y,mean age=53.3y)<br><br>(metastasis:24-89y,mean age=61y)                                            |                                                                                                                             |                                                                   |                                                                                                                             |
| Shiban et al.(2015) | glioma metastasis<br><br>(32–78y,mean age=53y)                                                                    | -DCS<br>-mDsCS<br>- Multi-train<br>(p=5, f=500 Hz, pd=0.4ms, si/DCS=14-26mA,si/DsCS≤20 mA)                                  | BB,FCR, thenar, hypothenar,TA                                     | -Halt of resection<br>-Removal of spatulas<br>-Irrigation(warm Ringer's solution)                                           |
| Lee et al.(2014)    | glioma<br>meningioma<br>metastasis<br>craniopharyngioma<br>granuloma<br>cavernoma<br><br>(24–80 y,median age=58y) | -TES<br>- Multi-train<br>(p=3–5, ISI=1-3ms,pd=0.5ms, si=200-400 V)                                                          | Bilateral:<br>FCR,FCU, thenar, hypothenar,TA,GAST, AH,ADM         | -Halt of resection<br>-Release of brain retraction<br>-Restoration of BP                                                    |
| Gempt et al.(2013)  | glioma (low/high grade)<br><br>(18–80 y, mean age =56y,SD=16)                                                     | -DCS<br>- Multi-train<br>(p=5, f=350 Hz,pd= 0.2-0.3 ms, si=6-30mA)                                                          | Contralateral:<br>BB,FCR,APB,ADM,TA                               | N/A                                                                                                                         |
| Ostrý et al.(2013)  | solitary lesion compressing or infiltrating the CST<br><br>(19-73y,mean age=48.8y)                                | -DCS<br>-mDsCS<br>- Multi-train<br>(p=5 ,f=500 Hz, pd=0.4 ms, si/DCS=5-10% above ST, si/DsCS≤30mA)                          | Contralateral:<br>BB,APB,ADQ,ED,QUAD, GAST,TA,AH                  | Resection interruption and subcortical mapping (If threshold increase ≥2 mA)                                                |
| Pastor et al.(2013) | primary brain tumors<br><br>(mean age= 49.8y, SD=2.4)                                                             | -DCS &TES<br>- Multi-train<br>(DCS:p=4–6 ,f= 500 Hz, pd= 0.15ms ,si=4-30mA<br>TES: p=5–6, f=500 Hz, pd=0.05ms,si=100–320 V) | Contralateral:<br>OO, DELT,BB,TRI,FC,ED, thenar,TA,AH,ADM         | -Changing of resection area<br>-Halt of resection<br>- Irrigation(warm saline)                                              |
| Seidel et al.(2013) | intrinsic brain tumors, metastases and vascular lesions not involving the PMC                                     | -DCS<br>- mDsCS<br>- Multi-train<br>(p=5,f=250 Hz ISI=4 ms, pd=0.5 ms, si/DsCS≤22 mA)                                       | Contralateral:<br>face, distal and proximal upper and lower limbs | -Halt of resection(stop of resection if ≥15 min MEP change)<br>-Ruling out technical confounders<br>-Normalizing anesthesia |

|                        |                                                                                                              |                                                                                                             |                                                                   |                                                                                                                                                         |
|------------------------|--------------------------------------------------------------------------------------------------------------|-------------------------------------------------------------------------------------------------------------|-------------------------------------------------------------------|---------------------------------------------------------------------------------------------------------------------------------------------------------|
|                        | (mean age= 50y, SD=17)                                                                                       |                                                                                                             |                                                                   | -Increase of CPP<br>-Nimodipine<br>-Removal of brain retractor (rarely)                                                                                 |
| Sakurada et al.(2012)  | glioma                                                                                                       | -DCS<br>-N/A simulation parameters                                                                          | N/A                                                               | N/A                                                                                                                                                     |
| Senft et al.(2012)     | glioma (low/high grade)<br><br>(mean age=47.7y, SD=13.3)                                                     | -DCS & TES<br>- Multi-train (p=5, ISI=4ms, pd=0.5ms)                                                        | N/A                                                               | -Halt of resection<br>-Irrigation(warm saline)<br>-Reappraisal of surgical strategy                                                                     |
| Hatiboglu et al.(2010) | Glioma<br><br>(age range of the 16 patients N/A)                                                             | -DCS<br>-Multi-train (p=5, f=500Hz, pd=0.3-0.5 ms, si≤20 mA)                                                | Contralateral: forearm, hand, leg and foot muscles                | N/A                                                                                                                                                     |
| Ichikawa et al.(2010)  | AVM<br><br>(9-56y)                                                                                           | -DCS<br>-Multi-train (p=5, f=500Hz, pd=0.2ms, si=10-35 mA)                                                  | Contralateral: FCR, thenar, TA                                    | -Stop of surgical maneuvers<br>-Hemostasis                                                                                                              |
| Szelényi et al.(2010)  | glioma<br>metastasis<br>meningioma<br>hemangioblastoma<br>colloid cyst<br><br>(7-70, mean age=42.8, SD=18.2) | -TES<br>-Multi-train (p=5, ISI=4ms, pd=0.5 ms, si/TES=ST+10-20%ST)                                          | Bilateral: APB, TA<br>Contralateral: BB, ED<br>Sometimes QUAD, AH | -Ruling out technical failures and anesthetic/ systemic confounders<br>-Reappraisal of surgical step<br>-Halt of resection<br>-Replacement of retractor |
| Kombos et al.(2009)    | intrinsic insular tumors<br><br>(23-61y)                                                                     | -TES<br>-mDsCS<br>- Multi-train (p=5, f=500 Hz, pd=0.3 ms, si/TES≤400 V, si/DsCS≤10mA)                      | Contralateral: forearm flexor, thenar, QUAD                       | -Halt of resection<br>-Papaverine                                                                                                                       |
| Neuloh et al.(2009)    | glioma<br>metastasis<br>cortical dysplasia                                                                   | -DCS & TES<br>- Multi-train (p=5-7 ,f=250-500Hz, ISI= 2-4 ms, pd= 0.3-1msec<br>DCS /si≤30mA, TES /si≤100mA) | forearm flexor, thenar, hypothenar, TA                            | -Halt of resection<br>-Cessation of vascular manipulation<br>-Readjustment of brain retractors<br>-Papaverine                                           |
| Neuloh et al.(2007)    | insular glioma<br><br>(9-73y, median age=39y)                                                                | -DCS & TES<br>- Multi-train                                                                                 | distal UE muscles<br>distal LE muscles                            | -Halt of resection<br>-Readjustment of brain retractors<br>-Papaverine                                                                                  |

|                     |                                                                                                                                |                                                                                    |                                                                             |                                                                                                                                                                                                                                                             |
|---------------------|--------------------------------------------------------------------------------------------------------------------------------|------------------------------------------------------------------------------------|-----------------------------------------------------------------------------|-------------------------------------------------------------------------------------------------------------------------------------------------------------------------------------------------------------------------------------------------------------|
|                     |                                                                                                                                | (p=4-7 ,f=250-500Hz, ISI= 2-4 ms, pd= 0.2-0.7msec<br>DCS /si≤30mA, TES /si≤100mA)  |                                                                             |                                                                                                                                                                                                                                                             |
| Suess et al.(2006)  | glioma<br>metastasis<br>meningioma<br>cavernoma<br>AVM<br>PNET<br>chondroma<br>epidermoid cyst<br><br>(16–87y, mean age=57.3y) | -DCS<br>- Multi-train<br>(p=5-7,f=400-500 Hz, pd=0.3 ms, si≤25mA)                  | Contralateral:<br>FCR,FCU,APB,PL, FDS,QUAD,GAST                             | -Release of spatulas<br>-Stop of electrocoagulation<br>-Check of strip electrode position                                                                                                                                                                   |
| Neuloh et al.(2004) | glioma<br>meningioma<br>metastasis<br>AVM<br><br>(11–79 y,median age=35y)                                                      | - DCS<br>- Multi-train<br>(p=4-7,f=250-500Hz, ISI= 2-4 ms, pd=0.2-0.7msec si≤30mA) | Contralateral:<br>forearm flexor, thenar, hypothenar, sometimes TA,OO,QUAD  | - Exclusion of technical reasons<br>- Increase of stimulus intensity up to maximum(if persisting MEP loss from all muscles in a limb)<br>- Readjustment of brain retractors<br>-Papaverine<br>-AVM: tamponade instead of electrocoagulation, increase of BP |
| Kombos et al.(2001) | glioma<br>meningioma<br>metastasis<br>AVM<br>epidermoid cyst<br><br>(16–79y,mean age= 56.2y]                                   | -DCS<br>-Multi-train<br>(p=7–10, f=400-500 Hz, pd=0.2-0.7 ms, si= 16.9 ± 7.76 mA)  | Contralateral:<br>forearm flexor, thenar, QUAD                              | - Check of electrode position and equipment<br>-Release of brain retractor                                                                                                                                                                                  |
| Zhou et al. (2001)  | glioma<br>metastasis<br>meningioma<br>ependymoma<br><br>(6-63y, mean age=43, SD=12.9)                                          | -TES<br>-Multi-train<br>(p=5, pd=0.5 ms, si=40–160 mA)                             | Contralateral:<br>BB,APB,TA,OO<br><br>Ipsilateral:<br>APB(negative control) | -Repeat stimulation with increased si or number of stimuli (train of seven)<br>-Ruling out nonsurgical factors<br>-Cessation of dissection<br>-Reposition of the retractor                                                                                  |

|                          |                                                                                           |                                                                                             |                                                                   |                                                                                                                                                                |
|--------------------------|-------------------------------------------------------------------------------------------|---------------------------------------------------------------------------------------------|-------------------------------------------------------------------|----------------------------------------------------------------------------------------------------------------------------------------------------------------|
| Cedzich et al.(1996)     | glioma<br>meningioma<br>metastasis<br>angioma<br>cavernoma<br><br>(4-74y, mean age=45.5y) | DCS<br>(p=1-5,f=500 Hz, pd=0.2-0.4ms, si=6-20 mA/ 30-110 V)                                 | Contralateral:<br>forearm flexor, thenar, hypothenar,sometimes TA | N/A                                                                                                                                                            |
| <b>EPILEPSY SURGERY</b>  |                                                                                           |                                                                                             |                                                                   |                                                                                                                                                                |
| Koo et al.(2019)         | Temporal lobe epilepsy surgery<br><br>(26–47 years, mean age= 33.3y,SD=8.6)               | -TES<br>-Multi-train<br>(p=5, ISI=2ms, pd=0.05-0.2 ms, si≤400V)                             | Bilateral:<br>APB,ADM,TA,AH                                       | -Halt of resection<br>-Release of brain retraction<br>-Increase of BP<br>-Irrigation(warm saline, nimodipine, papaverine)<br>-Reappraisal of surgical strategy |
| Neuloh et al.(2010)      | Intractable focal epilepsy-lesionectomy<br><br>(2-66 y,median age= 25.5y)                 | -DCS &TES<br>-Multi-train<br>(p=5-7, ISI= 2-4 ms, pd=0.3-1 ms, DCS/si≤30mA, TES /si≤100 mA) | Distal limb muscles                                               | Technical and surgical troubleshooting                                                                                                                         |
| <b>ANEURYSM CLIPPING</b> |                                                                                           |                                                                                             |                                                                   |                                                                                                                                                                |
| Guo et al. (2021)        | MCA aneurysms<br><br>(14-77y,mean age=53.93y, SD= 10.75)                                  | -TES<br>-Multi-train<br>(p=8,f=250-500Hz, ISI=0.05-0.5ms, si=100-400V)                      | APB,AH                                                            | - Exclusion of anesthetic/physiological effects<br>-Release of temporary clip<br>-Reposition of permanent clip                                                 |
| Park et al.(2021)        | ACA,ICA, MCA, AChA AcoA,PcoA aneurysms<br><br>(mean age=61.27y, SD=9.04)                  | -TES<br>-Multi-train<br>(p=5,ISI=1-4ms, pd=0.5 ms,si=200–350 V)                             | Bilateral:<br>APB,FCR,TA,AH                                       | -Release of temporary clip<br>-Release / reposition of permanent clip<br>-Relief of brain retractor<br>- Ruling out changes of BP, BT and anesthesia           |
| You et al.(2021)         | ICA aneurysms<br><br>(mean age=53.7y, SD=10.6)                                            | - TES<br>-Multi-train<br>(p=5-8 ,f=250-500Hz, pd=0.05-0.5ms,si=100-400V)                    | Bilateral:<br>APB,AH                                              | N/A                                                                                                                                                            |

|                       |                                                                          |                                                                                         |                                        |                                                                                              |
|-----------------------|--------------------------------------------------------------------------|-----------------------------------------------------------------------------------------|----------------------------------------|----------------------------------------------------------------------------------------------|
| Kameda et al.(2020)   | MCA aneurysms<br>(age:N/A)                                               | -DCS & TES<br>-Multi-train<br>(p=5, pd= 0.5ms, si=20% above ST)                         | Bilateral:<br>thenar                   | -Release of temporary clip<br>-Reposition of permanent clip                                  |
| Byoun et al.(2019)    | AChA aneurysms<br>(mean age=54.66y, SD=9.12)                             | -TES<br>-Multi-train<br>(p=5, ISI=2-4ms, pd=0.05 ms, si=250-500V)                       | Contralateral:<br>APB, ADM,TA,AH       | Increase of stimulation intensity within 30% of baseline                                     |
| Greve et al.(2019)    | ACA,ICA, MCA Aneurysms<br>(20–77y,mean age=57y,SD= 11)                   | -TES<br>-Multi-train<br>(p=4-5, ISI= 2-4msec, pd=0.5ms )                                | Bilateral:<br>APB,TA                   | Technical, surgical, and anesthesiological troubleshooting                                   |
| Li et al.(2019)       | Anterior and posterior circulation aneurysms<br>(18–77y, mean age=54y)   | -TES<br>-Multi-train<br>(p=8, pd=0.5-1ms, ISI=2-5ms, si= 100–400 V)                     | Bilateral:<br>APB,AH                   | -Loosening the clip<br>-Unblocking the occlusion                                             |
| Choi et al.(2017)     | ACA, AchA,MCA, PCA,PcoA aneurysms<br>(27–86y,mean age=57.5y,SD= 9.3)     | -TES<br>- Multi-train at 300-350V                                                       | Bilateral:<br>DELT,thenar,TA,AH        | -Stop of dissection<br>-Relief of brain retractor<br>-Release / reposition of aneurysm clips |
| Komatsu et al. (2017) | AChA,ICA, LSA.MCA aneurysms (temporal occlusion of the parent artery)    | -DCS<br>-si=5-15mA                                                                      | Bilateral:<br>APB,BB,DELT QUAD,GAST,TA | Release of temporary clip                                                                    |
| Staarman et al.(2017) | ACA,ICA, MCA,PCA AChA AcoA,PcoA, ophthalmic, BA, VA, SCA, PICA aneurysms | -TES<br>-Multi-train<br>(p≤7, pd=0.3ms, si=30-125V )                                    | APB, ADM,FCU, GAST,TA,AH               | N/A                                                                                          |
| Kim et al.(2016)      | Cerebral aneurysms<br>(26–82y, mean age=56.8y)                           | -TES<br>-Multi-train<br>(p=6, pd=0.5ms, ISI=3ms, si= 265.6±72.67 V)                     | Bilateral:<br>APB,TA,AH                | Reposition of clip                                                                           |
| Maruta et al.(2016)   | ACA, ICA, MCA, AcoA aneurysms<br>30-89y, mean age=61.1y, SD=11.1)        | -DCS & TES<br>-Multi-train<br>(p=5, pd=0.2-0.5ms, f=500Hz, si/DCS=ST+2mA si/TES= ST+2V) | APB,SOL,TA,AH                          | N/A                                                                                          |



|                           |                                                                                             |                                                                          |                                                           |                                                                                                                       |
|---------------------------|---------------------------------------------------------------------------------------------|--------------------------------------------------------------------------|-----------------------------------------------------------|-----------------------------------------------------------------------------------------------------------------------|
| Song et al.(2015)         | Giant intracranial ICA aneurysms<br><br>(24–60y, mean age=44y,SD=12.1)                      | -TES<br>-Multi-train (p=5, pd=0.1ms, ISI=2ms,si=300-400V)                | Bilateral: APB,AH<br><br>*ipsilateral as negative control | -Release of temporary clip<br>-Increase of BP                                                                         |
| Sasaki et al.(2014)       | AchA,LSA,MCA aneurysms<br><br>(age:N/A)                                                     | -DCS & TES<br>-N/A simulation parameters                                 | N/A                                                       | Reposition of clip                                                                                                    |
| Takebayashi et al. (2014) | ICA, MCA large and giant aneurysms<br><br>(14-79 years (mean age=53.2y, SD= 8.9)            | -DCS<br>-Multi-train (p=5, f=500Hz,pd=0.2ms)                             | Contralateral: thenar                                     | -Correction of clip position<br>-Readjustment of retractors<br>-Increase of BP<br>-Papaverine                         |
| Yue et al.(2014)          | MCA aneurysms<br><br>(17-67y, mean age=48.1y,SD=10.6)                                       | -TES<br>-Multi-train (p=5, ISI=2ms,pd=0.1ms, si=100-400V)                | Bilateral: APB,AH                                         | -Relief of brain retractor<br>-Release of temporary clip<br>-Reposition of permanent clip                             |
| Dengler et al.(2013)      | EC-IC bypass surgery (giant intracranial aneurysms)<br><br>(14-76 y, mean age=50.2y)        | -TES<br>-Multi-train (p=5, f=500Hz,pd=0.3ms, si≤400V)                    | Contralateral: forearm flexor, thenar, TA                 | -Ruling out nonsurgical factors<br>-Release of temporary clip<br>-Increasing the speed of suturing<br>-Increase of BP |
| Kang et al.(2013)         | ACA, ICA, MCA, AcoA,PcoA aneurysms<br><br>(33-74y, mean age=48y,SD=8.7y)                    | -TES<br>- Multi-train (p=5, ISI=2 ms, pd=0.2ms)                          | Contralateral: BR,APB,TA,AH                               | -Nimodipine<br>-Papaverine                                                                                            |
| Maruta et al.(2012)       | ACA, ICA, MCA, AcoA aneurysms (3 meningiomas, 1GBM)<br><br>(40-85y, mean age= 63y,SD= 10.8) | -DCS & TES<br>- Multi-train (p=5,pd=0.5-1ms,ISI=2ms,si=ST+2mA and ≤30mA) | SOL,TA,AH                                                 | N/A                                                                                                                   |
| Shi et al.(2012)          | ACA, ICA, MCA, PCA,AcoA,PcoA, aneurysms                                                     | -TES<br>Multi-train (p=3-7,pd=0.05,ISI=1-2ms,si=100-400V)                | OO,APB,AH                                                 | -Adjustment of temporary clip<br>-Papaverine<br>-Relief of brain retractor                                            |

|                        |                                                                                                                      |                                                                                            |                                                         |                                                                                                                                                                                                                                            |
|------------------------|----------------------------------------------------------------------------------------------------------------------|--------------------------------------------------------------------------------------------|---------------------------------------------------------|--------------------------------------------------------------------------------------------------------------------------------------------------------------------------------------------------------------------------------------------|
| Motoyama et al. (2011) | ACA, ICA, MCA aneurysms<br><br>(42-79y, mean age= 62.1y,SD= 8.9)                                                     | -DCS & TES<br>- Multi-train<br>(p=5, ISI=2ms, si/TES= ST +20V, si/DCS= ST +2 mA and ≤30mA) | Bilateral:<br>APB                                       | Reposition/Release of the clip                                                                                                                                                                                                             |
| Irie et al. (2010)     | ICA,MCA,AchA, PCoA,ophthalmic/ paraclinoid artery aneurysms<br><br>(mean age=66y, SD=11)                             | -TES<br>- Multi-train<br>(p= 5, ISI=0.5 ms, si=500 V)                                      | Bilateral:<br>APB,thenar                                | Reposition/ Release of the clip                                                                                                                                                                                                            |
| Yeon et al.(2010)      | ACA,ICA, MCA, AchA AcoA,PcoA aneurysms<br><br>(mean age=55y)                                                         | -TES<br>- Multi-train<br>(p=5, ISI=2ms, si=300–400 V)                                      | Bilateral:<br>APB,ADM,TA,AH                             | N/A                                                                                                                                                                                                                                        |
| Szelényi et al.(2007)  | ACA,ICA, MCA, AcoA, posterior circulation aneurysms<br><br>(mean age=51.5y, SD=14.7)                                 | -DCS & TES<br>-Multi-train<br>(p=5, ISI=4ms, pd=0.5 ms, si/TES=ST+5%ST, si/DCS≤ 25mA)      | Bilateral:<br>APB, TA,AH<br><br>Contralateral:<br>BB,ED | -Ruling out non-surgical confounders by recording TES-MEPs from both hemispheres<br>-Reappraisal of surgical strategy                                                                                                                      |
| Weinzierl et al.(2007) | ICA, MCA, PcoA aneurysms<br><br>(age range of the 18 aneurysm-patients N/A)                                          | -TES<br>-Multi-train<br>(p=4, ISI=2ms, pd=0.2 ms, si=100-700 V)                            | Bilateral:<br>APB, TA                                   | -Ruling out hemodynamic/systemic factors and technical confounders<br>-Release of temporary clip<br>-Release of retraction<br>-Reposition of permanent clip                                                                                |
| Szelényi et al.(2006)  | ACA, ICA, MCA, PCA,AcoA,PcoA, AchA, ophthalmic Artery,BA, PICA,SCA aneurysms<br><br>(9-85y, mean age=51.2y, SD=15.8) | -DCS & TES<br>-Multi-train<br>(p=5, ISI=4ms, pd=0.5 ms, si/TES≤ 240 mA, si/DCS≤ 33mA)      | Bilateral:<br>APB, TA<br><br>Contralateral:<br>BB,ED    | -Reposition of brain retractor<br>-After permanent clip: Doppler U/S, reposition of clip<br>-After temporary clip: clip reopening, duration of clipping as short as possible<br>-DCS MEP loss: Ruling out strip electrode displacement and |

|                                              |                                                                                                                          |                                                                     |                             |                                                                                                                       |
|----------------------------------------------|--------------------------------------------------------------------------------------------------------------------------|---------------------------------------------------------------------|-----------------------------|-----------------------------------------------------------------------------------------------------------------------|
|                                              |                                                                                                                          |                                                                     |                             | attempt to elicit MEP with TES                                                                                        |
| Horiuchi et al.(2005)                        | LSA and MCA aneurysms<br><br>(age N/A for all patients)                                                                  | -DCS<br>-Multi-train (p=5, f=500 Hz,pd=0.2 ms, si=ST+2mA)           | Contralateral: thenar       | N/A                                                                                                                   |
| Suzuki et al. (2003)                         | ICA(AchA, MCA,PcoA) aneurysms<br><br>(age N/A for all patients)                                                          | -DCS<br>- Multi-train (p=5, f=500 Hz, pd=0.2ms,si= ST+2mA)          | Contralateral: thenar       | Adjustment of surgical maneuvers                                                                                      |
| <b>ENDOVASCULAR PROCEDURES FOR ANEURYSMS</b> |                                                                                                                          |                                                                     |                             |                                                                                                                       |
| Nakagawa et al.(2020)                        | Anterior and posterior circulation aneurysms<br><br>(mean age=61y, SD=14)                                                | -TES<br>-Multi-train (p=5, ISI=2ms, pd= 1.5-2 ms., si=supramaximal) | Bilateral: APB, TA, GAST,AH | -Balloon deflation<br>-Guiding catheter reposition<br>-Intraarterial antithrombotic drug injection<br>-Coil retrieval |
| Wilent et al.(2020)                          | aneurysm<br>AVM<br>fistula<br>acute ischemic stroke<br>stenosis<br>vasospasm<br><br>(average patient age=57.1y)          | -TES<br>-N/A simulation parameters                                  | N/A                         | -Adjustment of instruments<br>-Increase of BP<br>-Active hemostasis<br>-Thrombolysis/Thrombectomy                     |
| Lee et al.(2019)                             | Cerebral artery aneurysms<br>AVM<br>Arteriovenous/ Carotid-cavernous fistula<br>Stenosis<br><br>(11–87y, mean age=59.5y) | -TES<br>-Multi-train (p=8, ISI=0.75ms,si=350-450 V)                 | Bilateral: APB,QUAD,TA,AH   | N/A                                                                                                                   |
| Piñeiro et al.(2015)                         | ICA,MCA,BA aneurysms<br>AVM<br><br>(38-74y)                                                                              | -TES<br>-Multi-train (p=5-7,ISI=4ms, pd=0.5ms,si≤300V)              | Bilateral: APB,TA,AH        | -Stop embolization<br>- Optimizing hemodynamic/systemic conditions                                                    |

|                       |                |                                                      |                |                         |
|-----------------------|----------------|------------------------------------------------------|----------------|-------------------------|
| Hiraishi et al.(2011) | AChA aneurysms | -TES<br>-Multi-train<br>(p=5, ISI=2ms, si=230-550 V) | BR, APB, AT,AH | Extraction of the coils |
|-----------------------|----------------|------------------------------------------------------|----------------|-------------------------|

**Abbreviations:**

**ACA:** Anterior Cerebral Artery ; **AChA:** Anterior Choroidal Artery ; **AcoA:** Anterior Communicating Artery ; **ADM:** Abductor Digiti Minimi ; **ADQ:** Abductor Digiti Quinti ; **AH:** Abductor Hallucis ; **APB:** Abductor Pollicis Brevis ; **AVM:** Arteriovenous Malformation ; **BA:** Basilar Artery ; **BB:** Brachial Biceps ; **bDsCS:** bipolar Direct Subcortical Simulation ; **BP:** Blood Pressure ; **BR:** Brachioradialis ; **BT:** Body Temperature ; **CPP:** Cerebral Perfusion Pressure ; **DCS:** Direct Cortical Stimulation ; **DELT:** Deltoid ; **DNET:** Dysembryoplastic Neuroepithelial Tumor **ED:** Extensor Digitorum ; **EDB:** Extensor Digitorum Brevis ; **FC:** Flexor Carpi ; **FCR:** Flexor Carpi Radialis ; **FCU:** Flexor Carpi Ulnaris ; **FDS:** Flexor Digitorum Superficialis ; **f:** frequency ; **GAST:** Gastrocnemius ; **ICA:** Internal Carotid Artery ; **ISI:** Interstimulus Interval ; **LE:** Lower Extremities ; **LSA:** Lenticulostriate Artery ; **MCA:** Middle Cerebral Artery ; **mDsCS:** monopolar Direct Subcortical Simulation ; **MEP:** Motor Evoked Potential ; **N/A:** Not available ; **OO:** Orbicularis Oris ; **p:** Number of pulses ; **PcoA:** Posterior Communicating Artery ; **pd:** pulse duration ; **PICA:** Posterior Inferior Cerebellar Artery ; **PL:** Palmaris Longus ; **PMC:** Primary Motor Cortex ; **PNET:** Primitive Neuroectodermal Tumor ; **QUAD:** Quadriceps Femoris ; **SCA:** Superior Cerebellar Artery ; **SD:** Standard Deviation ; **SOL:** Soleus ; **ST:** Stimulation Threshold ; **TA:** Tibialis Anterior ; **TES:** Transcranial Electrical Stimulation ; **TRI:** Triceps ; **UE:** Upper Extremities ; **U/S:** ultrasonography ; **VA:** Vertebral Artery ; **y:** years

**Supplementary Figure S1: Forest plot of sensitivity and specificity estimates for all motor deficits**

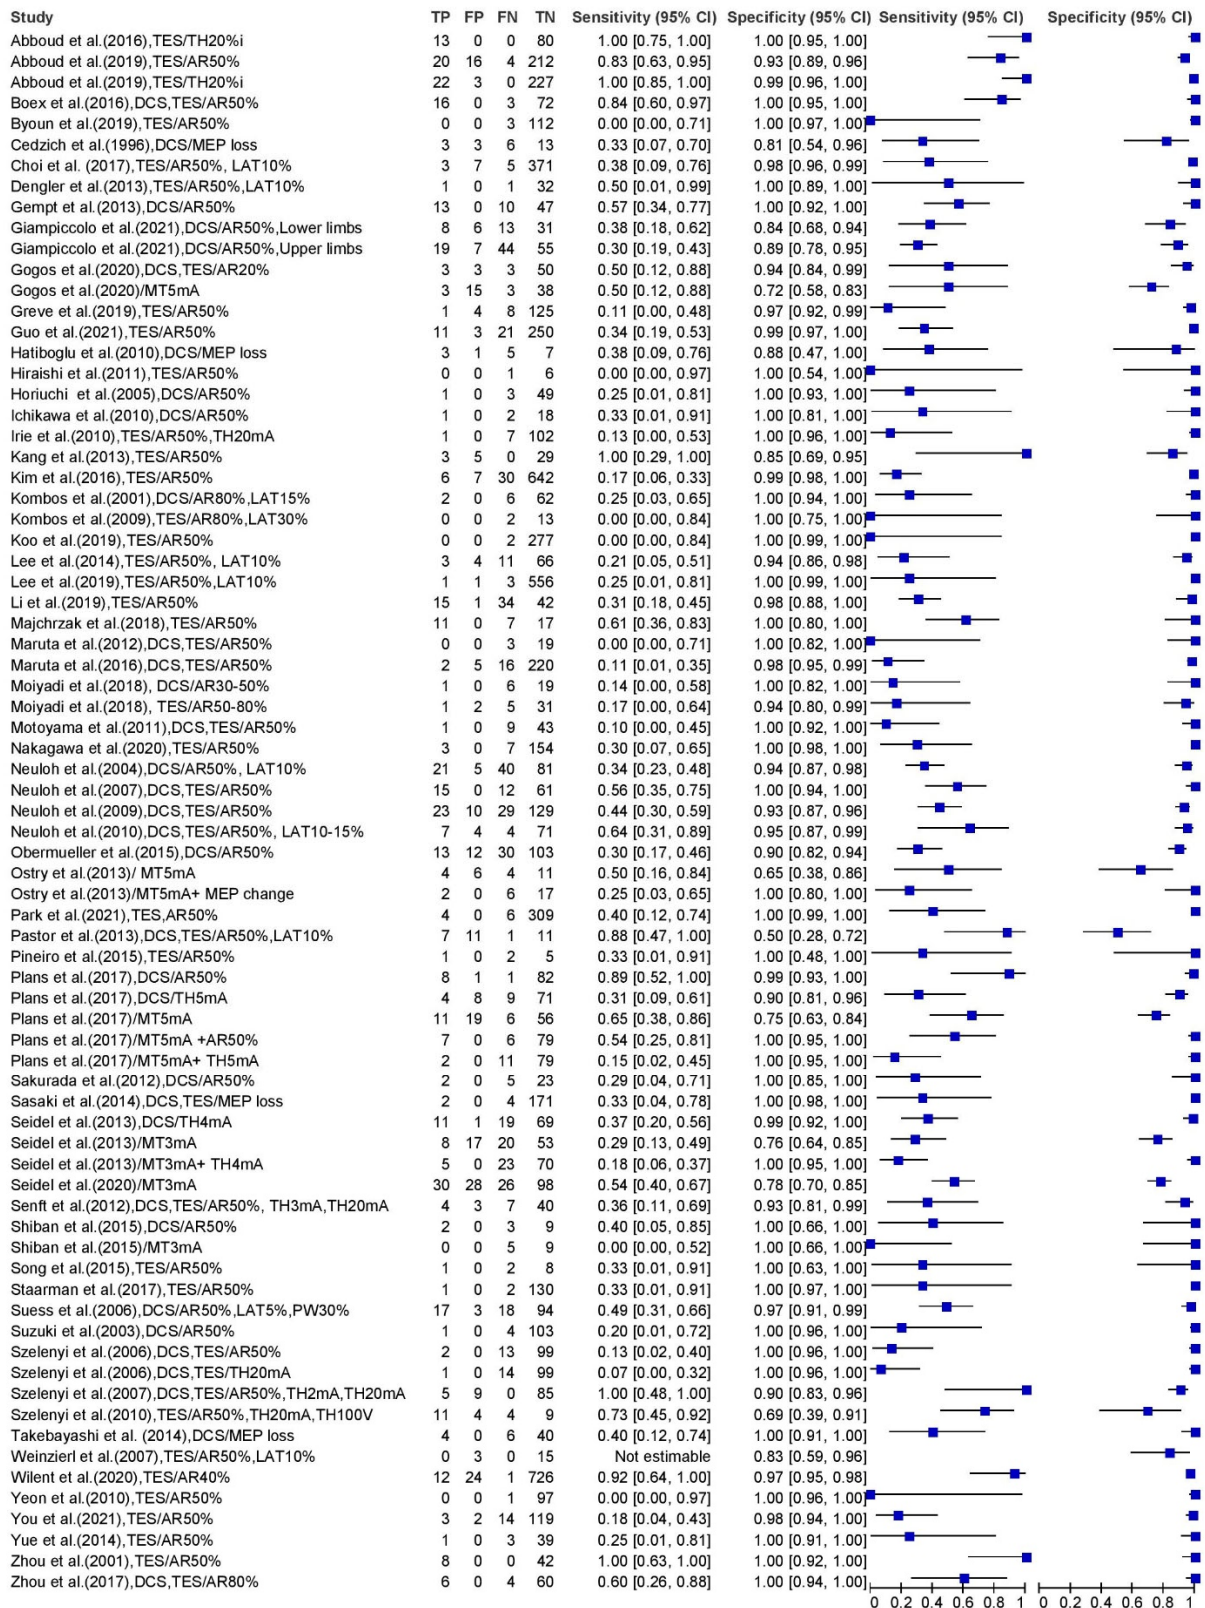

**Supplementary Figure S2: Forest plot of sensitivity and specificity estimates for transient motor deficits**

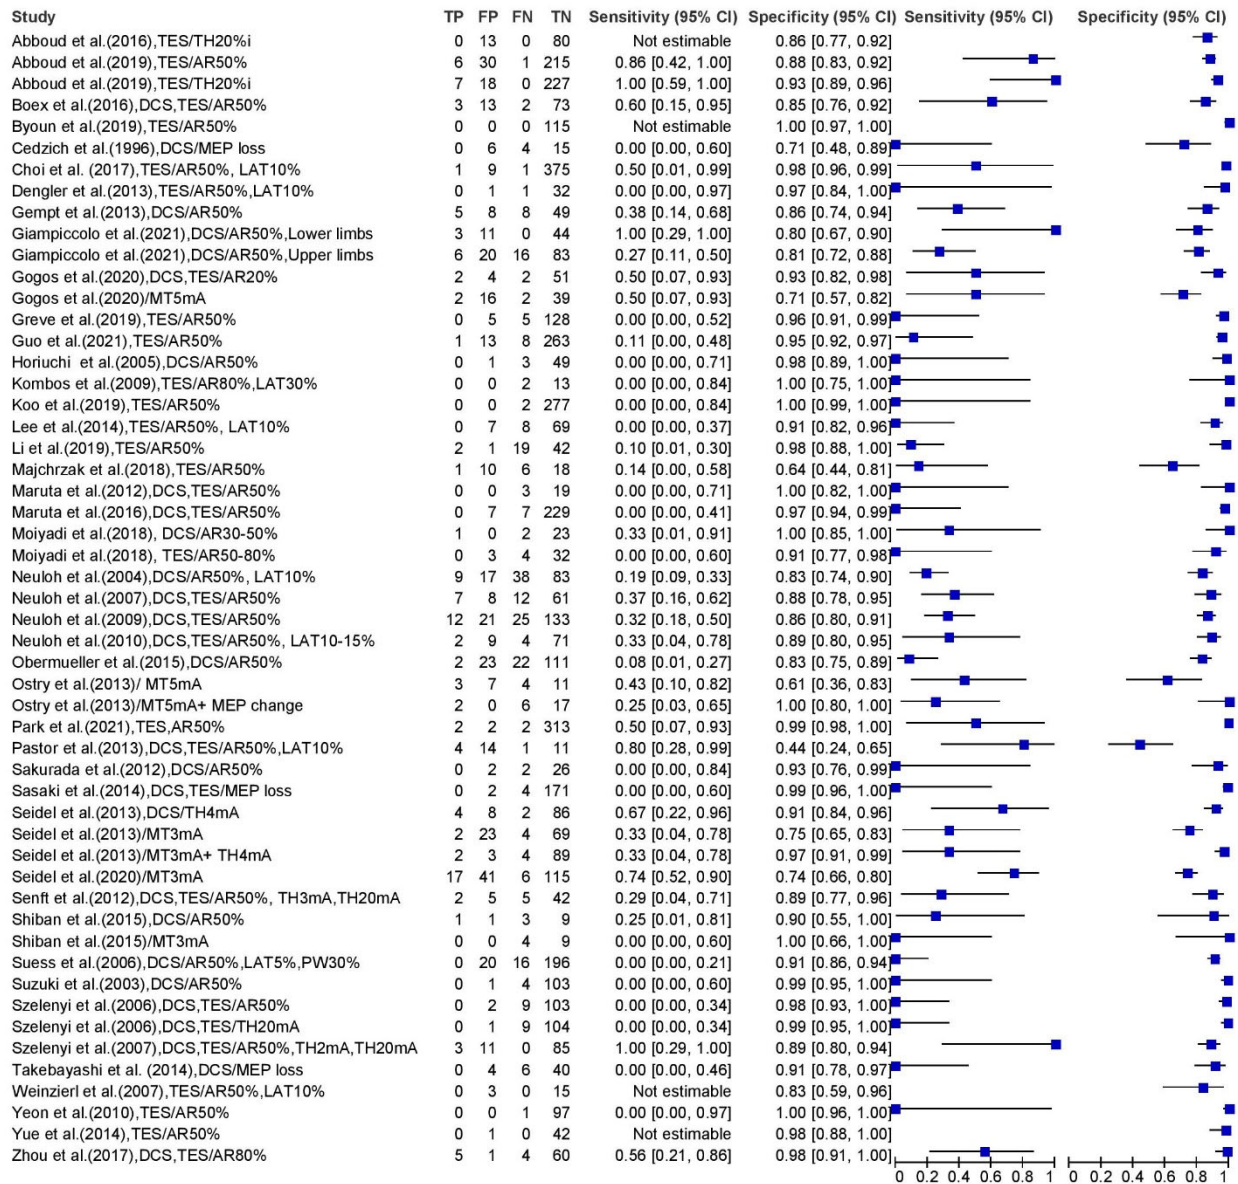



**Supplementary Figure S3:** Forest plot of sensitivity and specificity estimates for early-transient motor deficits

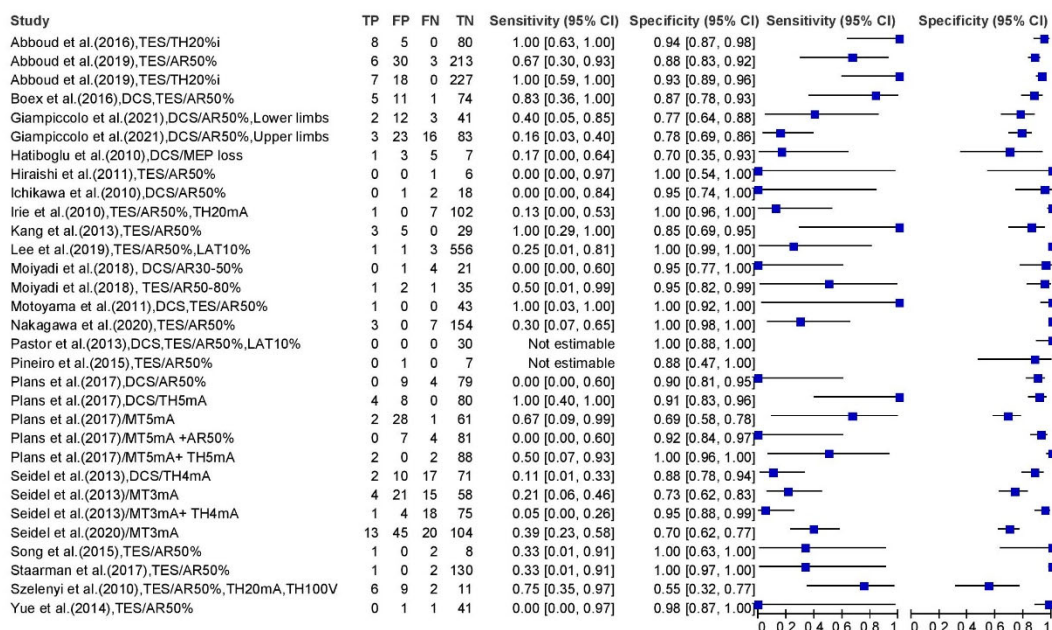

#### Abbreviations for Supplementary Figures S1,S2 and S3

**AR:** Amplitude criterion; **DCS:** Direct Cortical Stimulation; **FN:** False Negative; **FP:** False Positive; **i:** ipsilateral ; **LAT:** Latency criterion; **MEP:** Motor Evoked Potential ; **MT:** Motor Threshold/Mapping criterion; **PW:** Pulse Width Increase; **TES:** Transcranial Electrical Stimulation; **TH:** Threshold criterion; **TN:** True Negative; **TP:** True Positive

**Supplementary Figure S4:** Heatmap depicting the diagnostic accuracy measures of MEPs for permanent motor deficits

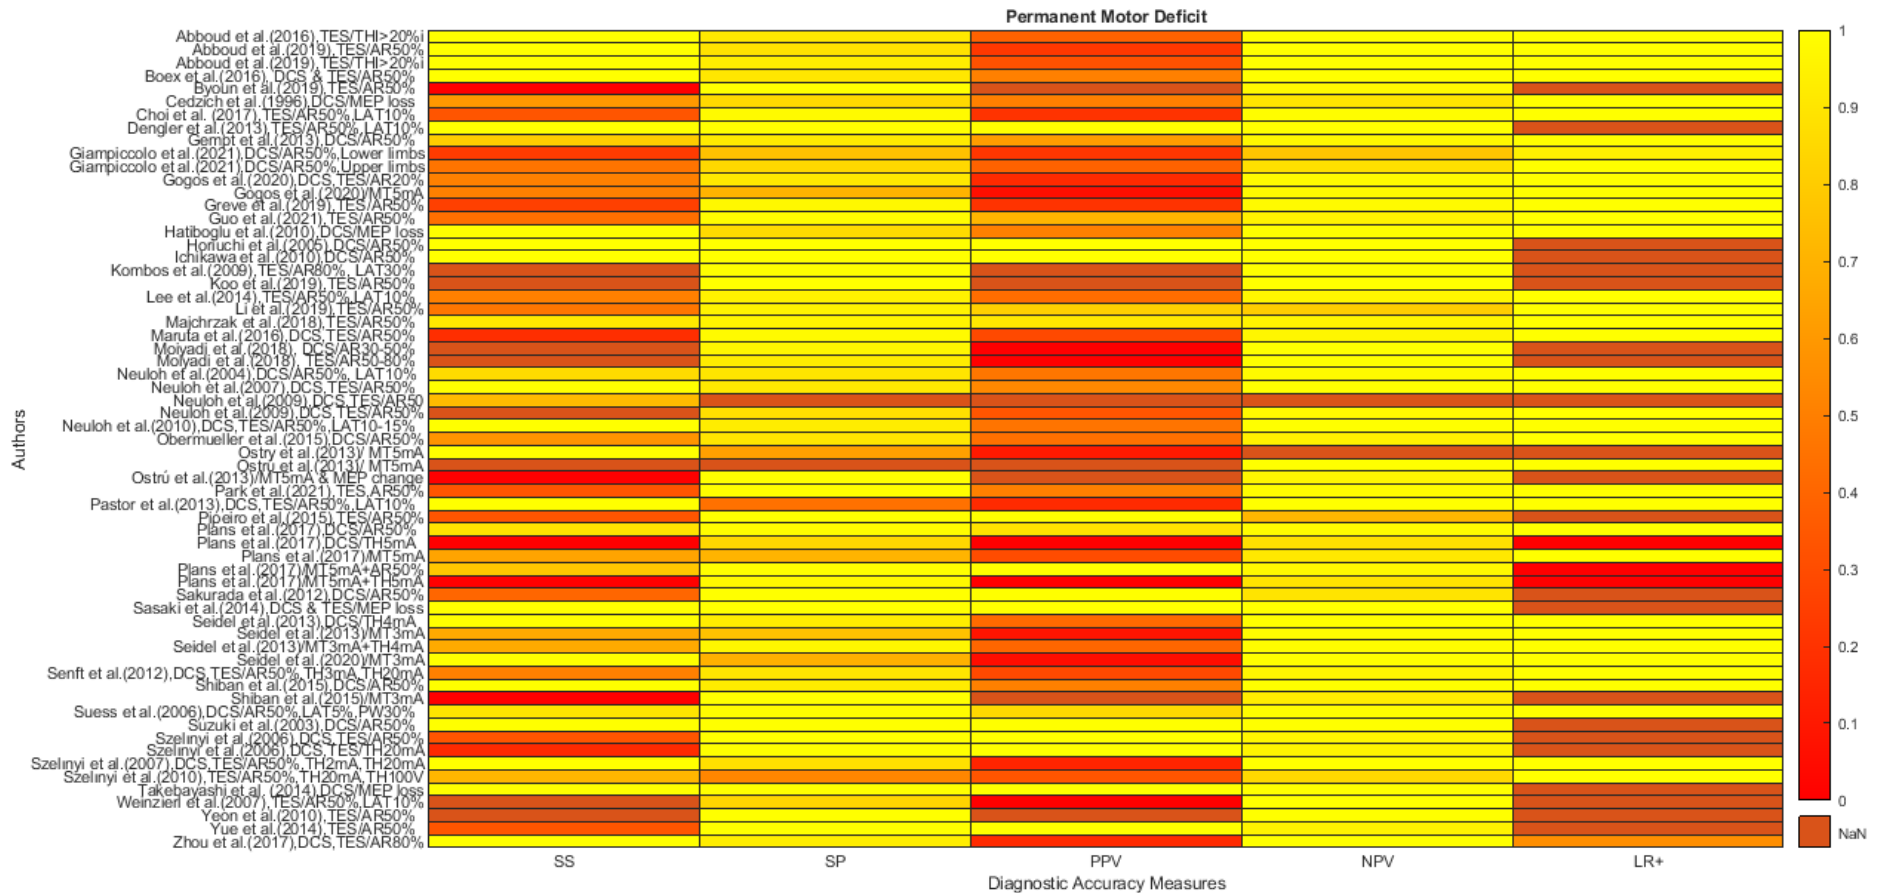



**Supplementary Figure S5:** Heatmap depicting the diagnostic accuracy measures of MEPs for transient motor deficits

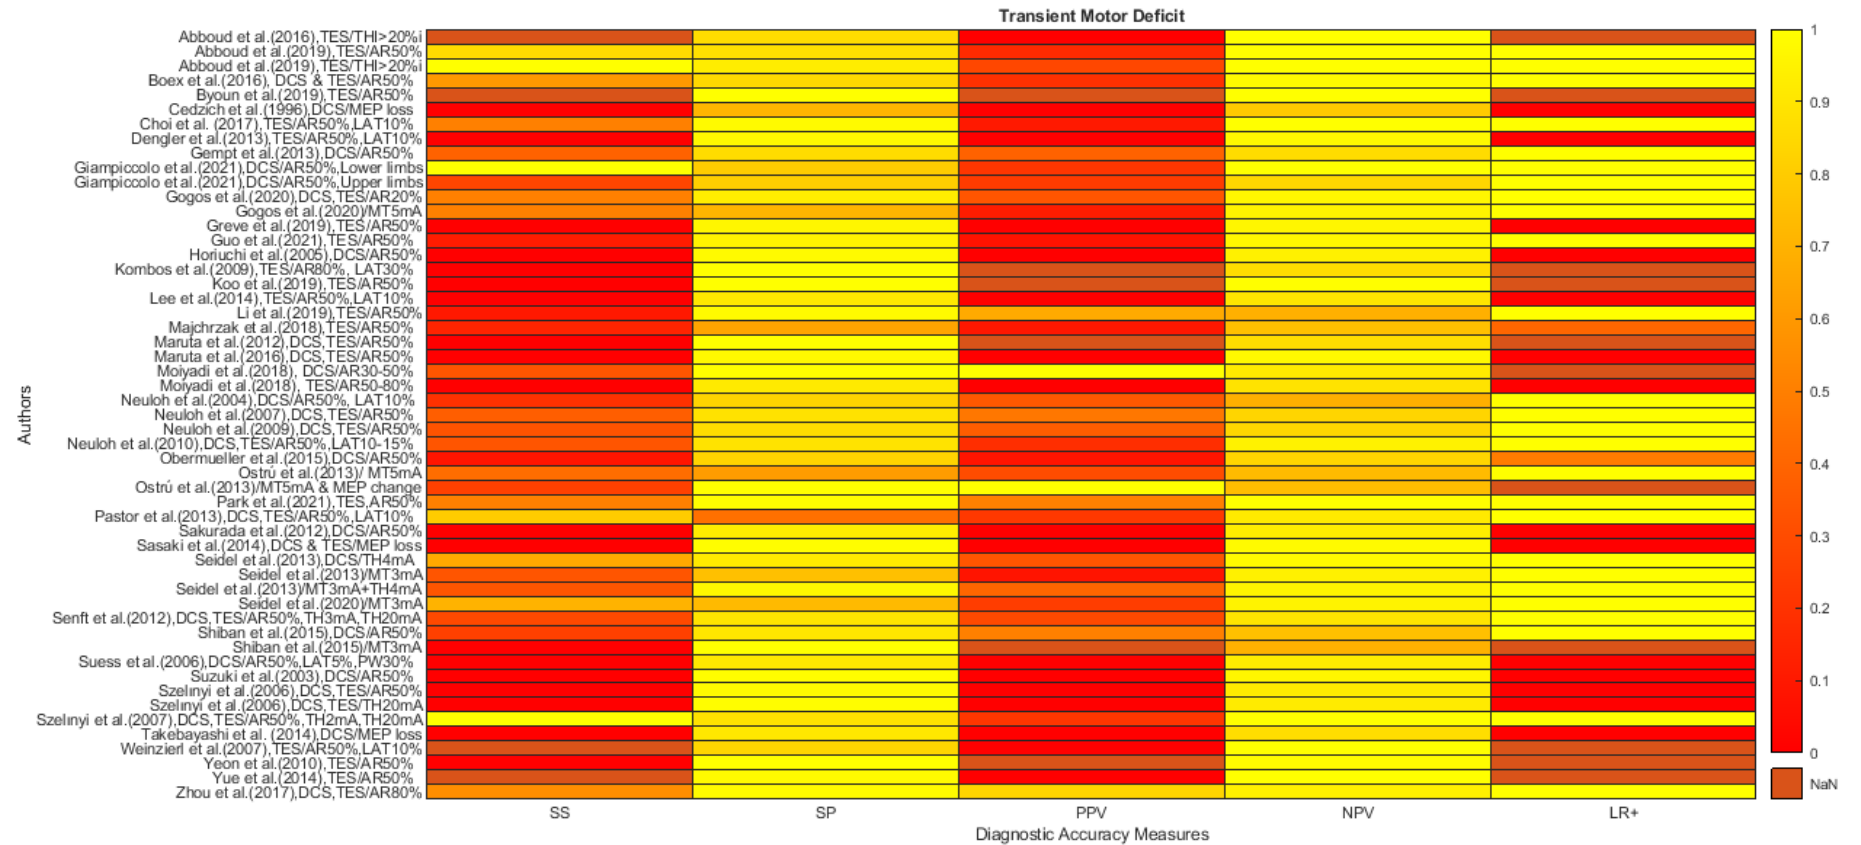

**Supplementary Figure S6:** Heatmap depicting the diagnostic accuracy measures of MEPs for early-transient motor deficits

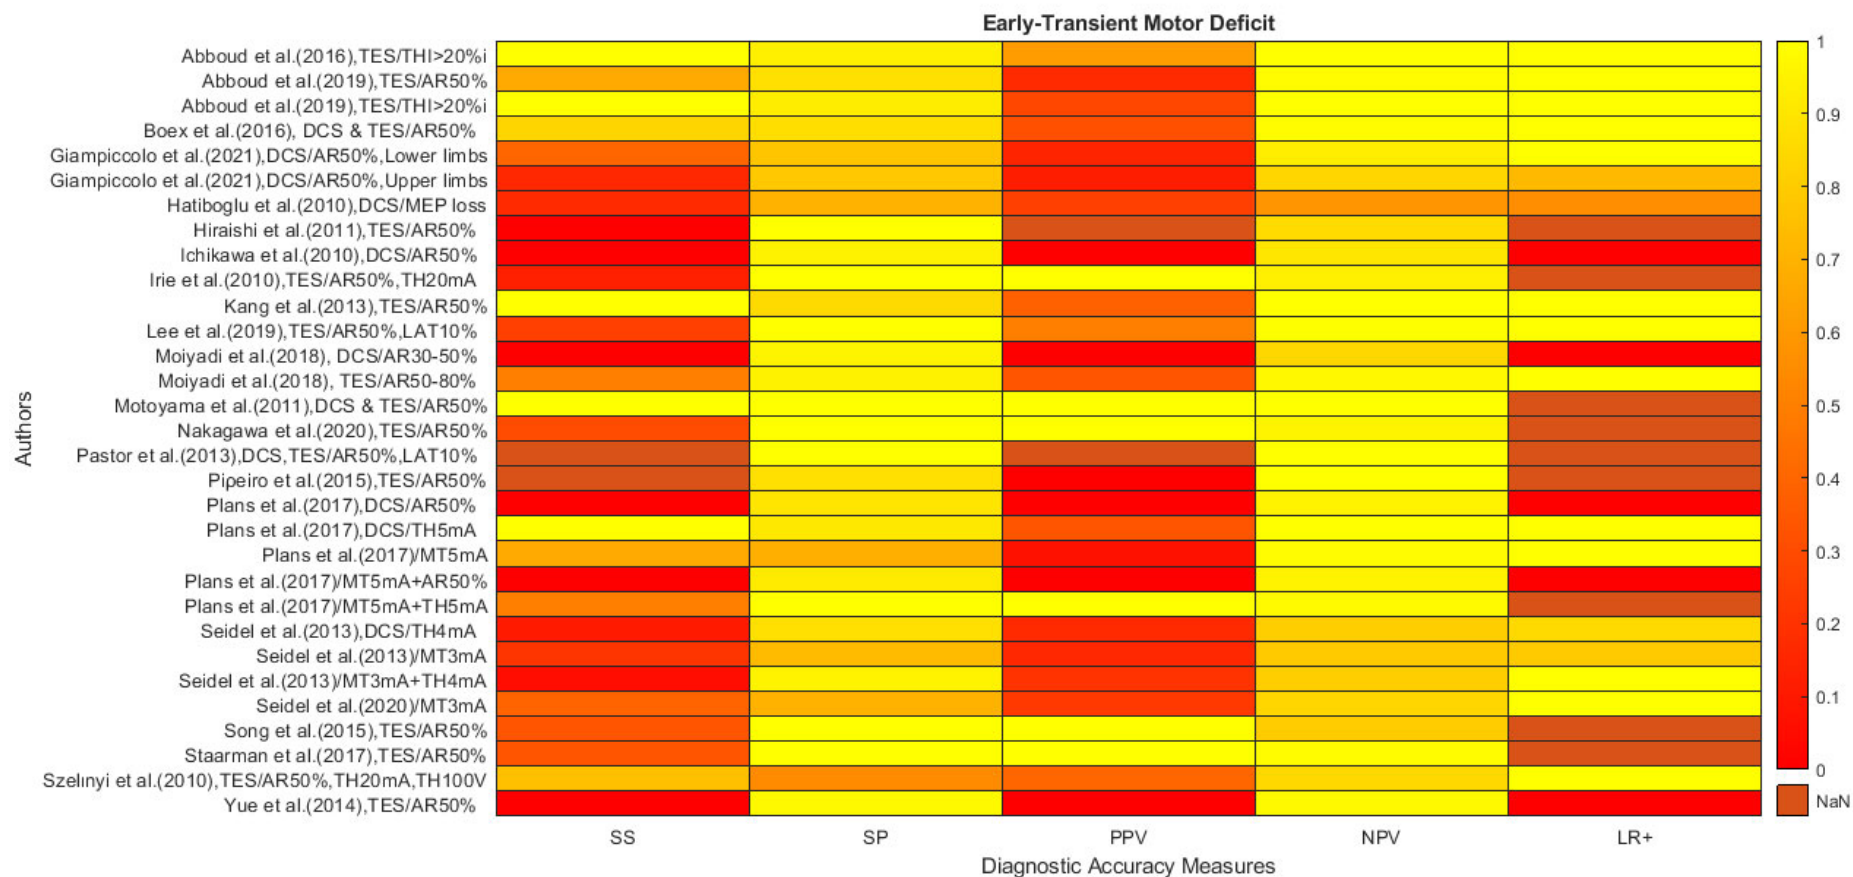

**Supplementary Figure S7:** Heatmap depicting the diagnostic accuracy measures of MEPs for all motor deficits

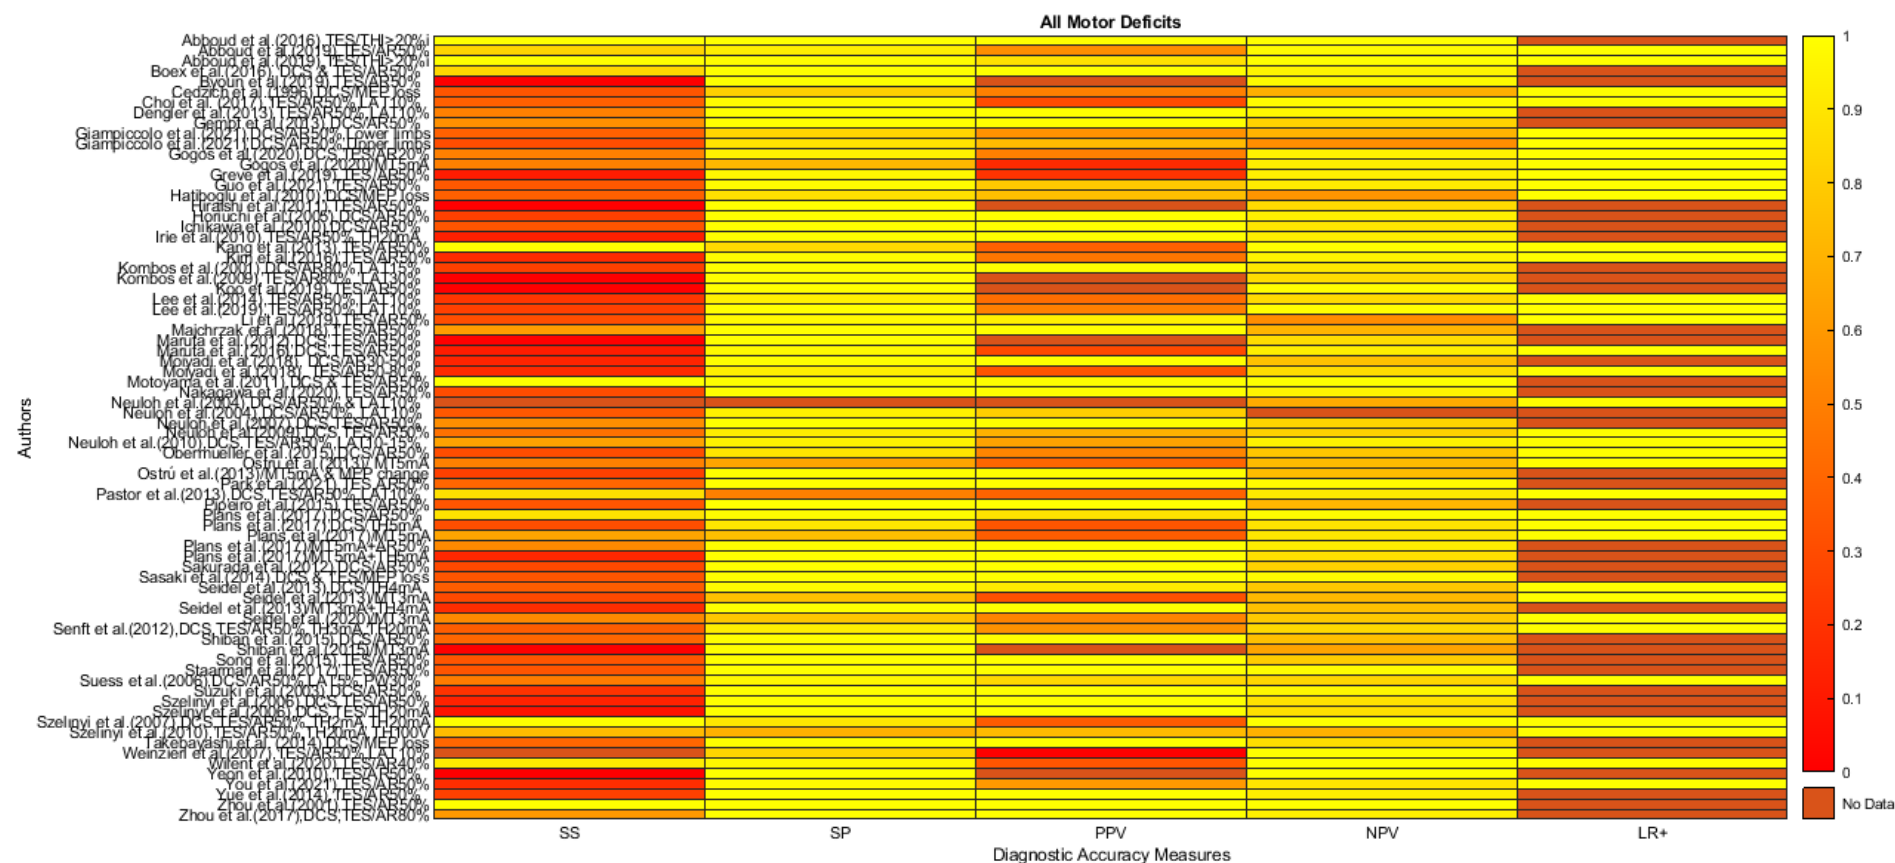

#### Abbreviations for Supplementary Figures S4,S5,S6 and S7

**AR:** Amplitude criterion; **DCS:** Direct Cortical Stimulation; **i:** ipsilateral; **LAT:** Latency criterion; **LR+:** Positive Likelihood Ratio; **MEP:** Motor Evoked Potential; **MT:** Motor Threshold/Mapping criterion; **NaN:** Not available; **NPV:** Negative Predictive Value; **PPV:** Positive Predictive Value; **PW:** Pulse Width; **SS:** Sensitivity; **SP:** Specificity; **TES:** Transcranial Electrical Stimulation; **TH:** Threshold criterion

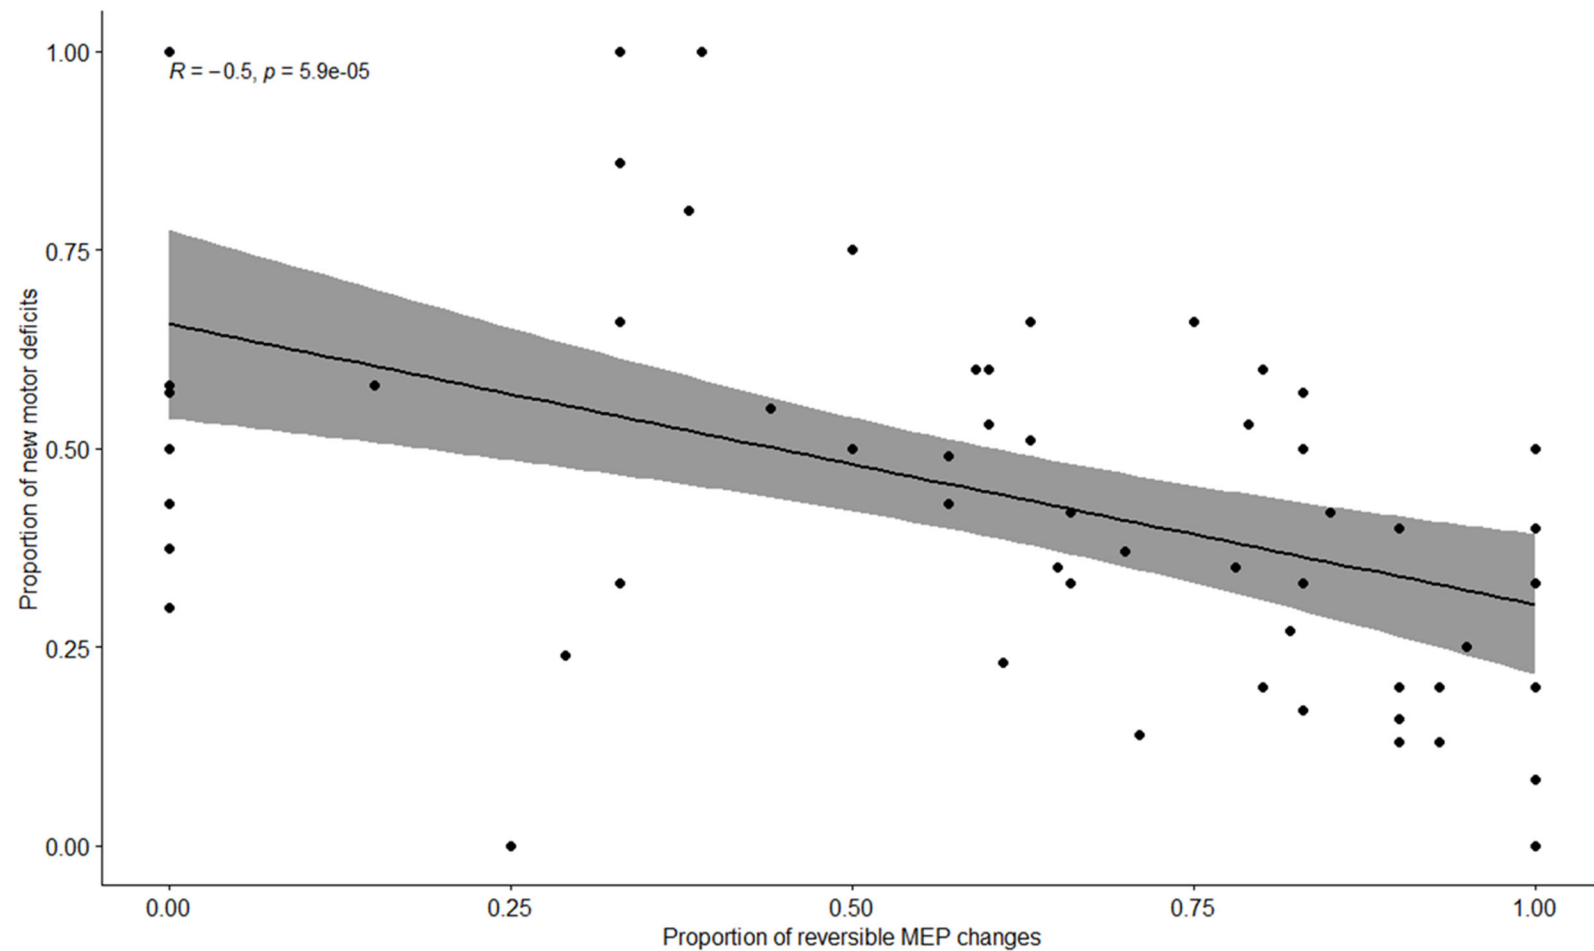

**Supplementary Figure S8:** Scatterplot with regression line and 95% confidence intervals depicting the negative correlation between the proportion of reversible MEP changes and the proportion of new motor deficits associated with MEP changes. Each dot represents one study. Spearman's rank correlation coefficient= -0.498( $p < 0.001$ ).

**Supplementary Table S3:** Diagnostic accuracy measures for all postoperative motor deficits

**All motor deficits**

| <u>Authors</u>                                | <u>DAM</u> | <u>Value</u> |
|-----------------------------------------------|------------|--------------|
| <b>Abboud et al.(2016),TES/THI&gt;20%i</b>    | SS         | 1            |
|                                               | SP         | 1            |
|                                               | PPV        | 1            |
|                                               | NPV        | 1            |
|                                               | LR+        | N/A          |
| <b>Abboud et al.(2019),TES/AR50%</b>          | SS         | 0.8333       |
|                                               | SP         | 0.9298       |
|                                               | PPV        | 0.5556       |
|                                               | NPV        | 0.9815       |
|                                               | LR+        | 11.875       |
| <b>Abboud et al.(2019),TES/THI&gt;20%i</b>    | SS         | 1            |
|                                               | SP         | 0.9870       |
|                                               | PPV        | 0.8800       |
|                                               | NPV        | 1            |
|                                               | LR+        | 76.666       |
| <b>Boex et al.(2016), DCS &amp; TES/AR50%</b> | SS         | 0.8421       |
|                                               | SP         | 1            |
|                                               | PPV        | 1            |
|                                               | NPV        | 0.9600       |
|                                               | LR+        | N/A          |
| <b>Byoun et al.(2019),TES/AR50%</b>           | SS         | 0            |
|                                               | SP         | 1            |
|                                               | PPV        | N/A          |
|                                               | NPV        | 0.9739       |
|                                               | LR+        | N/A          |
| <b>Cedzich et al.(1996),DCS/MEP loss</b>      | SS         | 0.3333       |

|                                                       |     |        |
|-------------------------------------------------------|-----|--------|
|                                                       | SP  | 0.8125 |
|                                                       | PPV | 0.5000 |
|                                                       | NPV | 0.6842 |
|                                                       | LR+ | 1.777  |
|                                                       | SS  | 0.3750 |
| <b>Choi et al. (2017),TES/AR50%,LAT10%</b>            | SP  | 0.9815 |
|                                                       | PPV | 0.3000 |
|                                                       | NPV | 0.9867 |
|                                                       | LR+ | 20.250 |
|                                                       | SS  | 0.5000 |
| <b>Dengler et al.(2013),TES/AR50%,LAT10%</b>          | SP  | 1      |
|                                                       | PPV | 1      |
|                                                       | NPV | 0.9697 |
|                                                       | LR+ | N/A    |
|                                                       | SS  | 0.5652 |
| <b>Gempt et al.(2013),DCS/AR50%</b>                   | SP  | 1      |
|                                                       | PPV | 1      |
|                                                       | NPV | 0.8246 |
|                                                       | LR+ | N/A    |
|                                                       | SS  | 0.3016 |
| <b>Giampiccolo et al.(2021),DCS/AR50%,Upper limbs</b> | SP  | 0.8871 |
|                                                       | PPV | 0.7308 |
|                                                       | NPV | 0.5556 |
|                                                       | LR+ | 2.671  |
|                                                       | SS  | 0.3810 |
| <b>Giampiccolo et al.(2021),DCS/AR50%,Lower limbs</b> | SP  | 0.8378 |
|                                                       | PPV | 0.5714 |
|                                                       | NPV | 0.7045 |
|                                                       | LR+ | 2.349  |
|                                                       | SS  | 0.5000 |
| <b>Gogos et al.(2020),DCS,TES/AR20%</b>               | SP  | 0.9434 |

|                                            |     |        |
|--------------------------------------------|-----|--------|
| <b>Gogos et al.(2020)/MT5mA</b>            | PPV | 0.5000 |
|                                            | NPV | 0.9434 |
|                                            | LR+ | 8.833  |
|                                            | SS  | 0.5000 |
|                                            | SP  | 0.7170 |
|                                            | PPV | 0.1667 |
| <b>Greve et al.(2019),TES/AR50%</b>        | NPV | 0.9268 |
|                                            | LR+ | 1.766  |
|                                            | SS  | 0.1111 |
|                                            | SP  | 0.9690 |
|                                            | PPV | 0.2000 |
|                                            | NPV | 0.9398 |
| <b>Guo et al.(2021),TES/AR50%</b>          | LR+ | 3.583  |
|                                            | SS  | 0.3438 |
|                                            | SP  | 0.9881 |
|                                            | PPV | 0.7857 |
|                                            | NPV | 0.9225 |
|                                            | LR+ | 28.989 |
| <b>Hatiboglu et al.(2010),DCS/MEP loss</b> | SS  | 0.3750 |
|                                            | SP  | 0.8750 |
|                                            | PPV | 0.7500 |
|                                            | NPV | 0.5833 |
|                                            | LR+ | 3.000  |
|                                            | SS  | 0      |
| <b>Hiraishi et al.(2011),TES/AR50%</b>     | SP  | 1      |
|                                            | PPV | N/A    |
|                                            | NPV | 0.8571 |
|                                            | LR+ | N/A    |
|                                            | SS  | 0.2500 |
|                                            | SP  | 1      |
| <b>Horiuchi et al.(2005),DCS/AR50%</b>     | PPV | 1      |

|                                       |     |        |        |
|---------------------------------------|-----|--------|--------|
| Ichikawa et al.(2010),DCS/AR50%       | NPV | 0.9423 |        |
|                                       | LR+ | N/A    |        |
|                                       | SS  | 0.3333 |        |
|                                       | SP  |        | 1      |
|                                       | PPV |        | 1      |
| Irie et al.(2010),TES/AR50%,TH20mA    | NPV | 0.9000 |        |
|                                       | LR+ | N/A    |        |
|                                       | SS  | 0.1250 |        |
|                                       | SP  |        | 1      |
|                                       | PPV |        | 1      |
| Kang et al.(2013),TES/AR50%           | NPV | 0.9358 |        |
|                                       | LR+ | N/A    |        |
|                                       | SS  |        | 1      |
|                                       | SP  | 0.8529 |        |
|                                       | PPV | 0.3750 |        |
| Kim et al.(2016),TES/AR50%            | NPV |        | 1      |
|                                       | LR+ |        | 6.800  |
|                                       | SS  | 0.1667 |        |
|                                       | SP  | 0.9892 |        |
|                                       | PPV | 0.4615 |        |
| Kombos et al.(2001),DCS/AR80%,LAT15%  | NPV | 0.9554 |        |
|                                       | LR+ |        | 15.452 |
|                                       | SS  | 0.2500 |        |
|                                       | SP  |        | 1      |
|                                       | PPV |        | 1      |
| Kombos et al.(2009),TES/AR80%, LAT30% | NPV | 0.9118 |        |
|                                       | LR+ | N/A    |        |
|                                       | SS  |        | 0      |
|                                       | SP  |        | 1      |
|                                       | PPV | N/A    |        |
|                                       | NPV | 0.8667 |        |



|                                          |     |        |         |
|------------------------------------------|-----|--------|---------|
| <b>Koo et al.(2019),TES/AR50%</b>        | LR+ | N/A    |         |
|                                          | SS  |        | 0       |
|                                          | SP  |        | 1       |
|                                          | PPV | N/A    |         |
|                                          | NPV | 0.9928 |         |
| <b>Lee et al.(2014),TES/AR50%,LAT10%</b> | LR+ | N/A    |         |
|                                          | SS  | 0.2143 |         |
|                                          | SP  | 0.9429 |         |
|                                          | PPV | 0.4286 |         |
|                                          | NPV | 0.8571 |         |
| <b>Lee et al.(2019),TES/AR50%,LAT10%</b> | LR+ |        | 3.750   |
|                                          | SS  | 0.2500 |         |
|                                          | SP  | 0.9982 |         |
|                                          | PPV | 0.5000 |         |
|                                          | NPV | 0.9946 |         |
| <b>Li et al.(2019),TES/AR50%</b>         | LR+ |        | 139.250 |
|                                          | SS  | 0.3061 |         |
|                                          | SP  | 0.9767 |         |
|                                          | PPV | 0.9375 |         |
|                                          | NPV | 0.5526 |         |
| <b>Majchrzak et al.(2018),TES/AR50%</b>  | LR+ |        | 13.163  |
|                                          | SS  | 0.6111 |         |
|                                          | SP  |        | 1       |
|                                          | PPV |        | 1       |
|                                          | NPV | 0.7083 |         |
| <b>Maruta et al.(2012),DCS,TES/AR50%</b> | LR+ | N/A    |         |
|                                          | SS  |        | 0       |
|                                          | SP  |        | 1       |
|                                          | PPV | N/A    |         |
|                                          | NPV | 0.8636 |         |
|                                          | LR+ | N/A    |         |

|                                                  |     |        |
|--------------------------------------------------|-----|--------|
| <b>Maruta et al.(2016),DCS,TES/AR50%</b>         | SS  | 0.1111 |
|                                                  | SP  | 0.9778 |
|                                                  | PPV | 0.2857 |
|                                                  | NPV | 0.9322 |
|                                                  | LR+ | 5.000  |
| <b>Moiyadi et al.(2018), DCS/AR30-50%</b>        | SS  | 0.1429 |
|                                                  | SP  | 1      |
|                                                  | PPV | 1      |
|                                                  | NPV | 0.7600 |
|                                                  | LR+ | N/A    |
| <b>Moiyadi et al.(2018), TES/AR50-80%</b>        | SS  | 0.1667 |
|                                                  | SP  | 0.9394 |
|                                                  | PPV | 0.3333 |
|                                                  | NPV | 0.8611 |
|                                                  | LR+ | 2.750  |
| <b>Motoyama et al.(2011),DCS &amp; TES/AR50%</b> | SS  | 1      |
|                                                  | SP  | 1      |
|                                                  | PPV | 1      |
|                                                  | NPV | 1      |
|                                                  | LR+ | N/A    |
| <b>Nakagawa et al.(2020),TES/AR50%</b>           | SS  | 0.3000 |
|                                                  | SP  | 1      |
|                                                  | PPV | 1      |
|                                                  | NPV | 0.9565 |
|                                                  | LR+ | N/A    |
| <b>Neuloh et al.(2004),DCS/AR50%, LAT10%</b>     | SS  | 0.3443 |
|                                                  | SP  | 0.9419 |
|                                                  | PPV | 0.8077 |
|                                                  | NPV | 0.6694 |
|                                                  | LR+ | 5.921  |
| <b>Neuloh et al.(2007),DCS,TES/AR50%</b>         | SS  | 0.5556 |

|                                                    |     |        |
|----------------------------------------------------|-----|--------|
|                                                    | SP  | 1      |
|                                                    | PPV | 1      |
|                                                    | NPV | 0.8356 |
|                                                    | LR+ | N/A    |
| <b>Neuloh et al.(2009),DCS,TES/AR50%</b>           | SS  | 0.4423 |
|                                                    | SP  | 0.9281 |
|                                                    | PPV | 0.6970 |
|                                                    | NPV | 0.8165 |
|                                                    | LR+ | 6.148  |
| <b>Neuloh et al.(2010),DCS,TES/AR50%,LAT10-15%</b> | SS  | 0.6364 |
|                                                    | SP  | 0.9467 |
|                                                    | PPV | 0.6364 |
|                                                    | NPV | 0.9467 |
|                                                    | LR+ | 11.931 |
| <b>Obermueller et al.(2015),DCS/AR50%</b>          | SS  | 0.3023 |
|                                                    | SP  | 0.8957 |
|                                                    | PPV | 0.5200 |
|                                                    | NPV | 0.7744 |
|                                                    | LR+ | 2.897  |
| <b>Ostrý et al.(2013)/ MT5mA</b>                   | SS  | 0.5000 |
|                                                    | SP  | 0.6471 |
|                                                    | PPV | 0.4000 |
|                                                    | NPV | 0.7333 |
|                                                    | LR+ | 1.416  |
| <b>Ostrý et al.(2013)/MT5mA &amp; MEP change</b>   | SS  | 0.2500 |
|                                                    | SP  | 1      |
|                                                    | PPV | 1      |
|                                                    | NPV | 0.7391 |
|                                                    | LR+ | N/A    |
| <b>Park et al.(2021),TES,AR50%</b>                 | SS  | 0.4000 |
|                                                    | SP  | 1      |

|                                                 |     |        |
|-------------------------------------------------|-----|--------|
| <b>Pastor et al.(2013),DCS,TES/AR50%,LAT10%</b> | PPV | 1      |
|                                                 | NPV | 0.9810 |
|                                                 | LR+ | N/A    |
|                                                 | SS  | 0.8750 |
|                                                 | SP  | 0.5000 |
|                                                 | PPV | 0.3889 |
|                                                 | NPV | 0.9167 |
| <b>Piñeiro et al.(2015),TES/AR50%</b>           | LR+ | 1.750  |
|                                                 | SS  | 0.3333 |
|                                                 | SP  | 1      |
|                                                 | PPV | 1      |
|                                                 | NPV | 0.7143 |
| <b>Plans et al.(2017),DCS/AR50%</b>             | LR+ | N/A    |
|                                                 | SS  | 0.8889 |
|                                                 | SP  | 0.9880 |
|                                                 | PPV | 0.8889 |
|                                                 | NPV | 0.9880 |
|                                                 | LR+ | 73.777 |
| <b>Plans et al.(2017),DCS/TH5mA</b>             | SS  | 0.3077 |
|                                                 | SP  | 0.8987 |
|                                                 | PPV | 0.3333 |
|                                                 | NPV | 0.8875 |
|                                                 | LR+ | 3.038  |
| <b>Plans et al.(2017)/MT5mA</b>                 | SS  | 0.6471 |
|                                                 | SP  | 0.7467 |
|                                                 | PPV | 0.3667 |
|                                                 | NPV | 0.9032 |
|                                                 | LR+ | 2.554  |
| <b>Plans et al.(2017)/MT5mA+AR50%</b>           | SS  | 0.5385 |
|                                                 | SP  | 1      |
|                                                 | PPV | 1      |

|                                        |     |        |   |
|----------------------------------------|-----|--------|---|
| Plans et al.(2017)/MT5mA+TH5mA         | NPV | 0.9294 |   |
|                                        | LR+ | N/A    |   |
|                                        | SS  | 0.1538 |   |
|                                        | SP  |        | 1 |
|                                        | PPV |        | 1 |
| Sakurada et al.(2012),DCS/AR50%        | NPV | 0.8778 |   |
|                                        | LR+ | N/A    |   |
|                                        | SS  | 0.2857 |   |
|                                        | SP  |        | 1 |
|                                        | PPV |        | 1 |
| Sasaki et al.(2014),DCS & TES/MEP loss | NPV | 0.8214 |   |
|                                        | LR+ | N/A    |   |
|                                        | SS  | 0.3333 |   |
|                                        | SP  |        | 1 |
|                                        | PPV |        | 1 |
| Seidel et al.(2013),DCS/TH4mA          | NPV | 0.9771 |   |
|                                        | LR+ | N/A    |   |
|                                        | SS  | 0.3667 |   |
|                                        | SP  | 0.9857 |   |
|                                        | PPV | 0.9167 |   |
| Seidel et al.(2013)/MT3mA              | NPV | 0.7841 |   |
|                                        | LR+ | 25.666 |   |
|                                        | SS  | 0.2857 |   |
|                                        | SP  | 0.7571 |   |
|                                        | PPV | 0.3200 |   |
| Seidel et al.(2013)/MT3mA+TH4mA        | NPV | 0.7260 |   |
|                                        | LR+ | 1.176  |   |
|                                        | SS  | 0.1786 |   |
|                                        | SP  |        | 1 |
|                                        | PPV |        | 1 |
|                                        | NPV | 0.7527 |   |

|                                                      |     |        |
|------------------------------------------------------|-----|--------|
| <b>Seidel et al.(2020)/MT3mA</b>                     | LR+ | N/A    |
|                                                      | SS  | 0.5357 |
|                                                      | SP  | 0.7778 |
|                                                      | PPV | 0.5172 |
|                                                      | NPV | 0.7903 |
| <b>Senft et al.(2012),DCS,TES/AR50%,TH3mA,TH20mA</b> | LR+ | 2.410  |
|                                                      | SS  | 0.3636 |
|                                                      | SP  | 0.9302 |
|                                                      | PPV | 0.5714 |
|                                                      | NPV | 0.8511 |
| <b>Shiban et al.(2015),DCS/AR50%</b>                 | LR+ | 5.212  |
|                                                      | SS  | 0.4000 |
|                                                      | SP  | 1      |
|                                                      | PPV | 1      |
|                                                      | NPV | 0.7500 |
| <b>Shiban et al.(2015)/MT3mA</b>                     | LR+ | N/A    |
|                                                      | SS  | 0      |
|                                                      | SP  | 1      |
|                                                      | PPV | N/A    |
|                                                      | NPV | 0.6429 |
| <b>Song et al.(2015),TES/AR50%</b>                   | LR+ | N/A    |
|                                                      | SS  | 0.3333 |
|                                                      | SP  | 1      |
|                                                      | PPV | 1      |
|                                                      | NPV | 0.8000 |
| <b>Staarman et al.(2017),TES/AR50%</b>               | LR+ | N/A    |
|                                                      | SS  | 0.3333 |
|                                                      | SP  | 1      |
|                                                      | PPV | 1      |
|                                                      | NPV | 0.9848 |
|                                                      | LR+ | N/A    |

|                                                         |     |        |
|---------------------------------------------------------|-----|--------|
| <b>Suess et al.(2006),DCS/AR50%,LAT5%,PW30%</b>         | SS  | 0.4857 |
|                                                         | SP  | 0.9691 |
|                                                         | PPV | 0.8500 |
|                                                         | NPV | 0.8393 |
|                                                         | LR+ | 15.704 |
| <b>Suzuki et al.(2003),DCS/AR50%</b>                    | SS  | 0.2000 |
|                                                         | SP  | 1      |
|                                                         | PPV | 1      |
|                                                         | NPV | 0.9626 |
|                                                         | LR+ | N/A    |
| <b>Szelényi et al.(2006),DCS,TES/AR50%</b>              | SS  | 0.1333 |
|                                                         | SP  | 1      |
|                                                         | PPV | 1      |
|                                                         | NPV | 0.8839 |
|                                                         | LR+ | N/A    |
| <b>Szelényi et al.(2006),DCS,TES/TH20mA</b>             | SS  | 0.0667 |
|                                                         | SP  | 1      |
|                                                         | PPV | 1      |
|                                                         | NPV | 0.8761 |
|                                                         | LR+ | N/A    |
| <b>Szelényi et al.(2007),DCS,TES/AR50%,TH2mA,TH20mA</b> | SS  | 1      |
|                                                         | SP  | 0.9043 |
|                                                         | PPV | 0.3571 |
|                                                         | NPV | 1      |
|                                                         | LR+ | 10.444 |
| <b>Szelényi et al.(2010),TES/AR50%,TH20mA,TH100V</b>    | SS  | 0.7333 |
|                                                         | SP  | 0.6923 |
|                                                         | PPV | 0.7333 |
|                                                         | NPV | 0.6923 |
|                                                         | LR+ | 2.383  |

|                                                |     |        |   |
|------------------------------------------------|-----|--------|---|
| <b>Takebayashi et al. (2014),DCS/MEP loss</b>  | SS  | 0.4000 |   |
|                                                | SP  |        | 1 |
|                                                | PPV |        | 1 |
|                                                | NPV | 0.8696 |   |
|                                                | LR+ | N/A    |   |
| <b>Weinzierl et al.(2007),TES/AR50%,LAT10%</b> | SS  | N/A    |   |
|                                                | SP  | 0.8333 |   |
|                                                | PPV |        | 0 |
|                                                | NPV |        | 1 |
|                                                | LR+ | N/A    |   |
| <b>Wilent et al.(2020),TES/AR40%</b>           | SS  | 0.9231 |   |
|                                                | SP  | 0.9680 |   |
|                                                | PPV | 0.3333 |   |
|                                                | NPV | 0.9986 |   |
|                                                | LR+ | 28.846 |   |
| <b>Yeon et al.(2010),TES/AR50%</b>             | SS  |        | 0 |
|                                                | SP  |        | 1 |
|                                                | PPV | N/A    |   |
|                                                | NPV | 0.9898 |   |
|                                                | LR+ | N/A    |   |
| <b>You et al.(2021),TES/AR50%</b>              | SS  | 0.1765 |   |
|                                                | SP  | 0.9835 |   |
|                                                | PPV | 0.6000 |   |
|                                                | NPV | 0.8947 |   |
|                                                | LR+ | 10.676 |   |
| <b>Yue et al.(2014),TES/AR50%</b>              | SS  | 0.2500 |   |
|                                                | SP  |        | 1 |
|                                                | PPV |        | 1 |
|                                                | NPV | 0.9286 |   |
|                                                | LR+ | N/A    |   |
| <b>Zhou et al.(2001),TES/AR50%</b>             | SS  |        | 1 |



|                                 |     |        |
|---------------------------------|-----|--------|
| Zhou et al.(2017),DCS,TES/AR80% | SP  | 1      |
|                                 | PPV | 1      |
|                                 | NPV | 1      |
|                                 | LR+ | N/A    |
|                                 | SS  | 0.6000 |
|                                 | SP  | 1      |
|                                 | PPV | 1      |
|                                 | NPV | 0.9375 |
|                                 | LR+ | N/A    |

**Supplementary Table S4:** Diagnostic accuracy measures for permanent postoperative motor deficits

**Permanent motor deficit**

| <u>Authors</u>                     | <u>DAM</u> | <u>Value</u> |
|------------------------------------|------------|--------------|
| Abboud et al.(2016),TES/THI>20%i   | SS         | 1            |
|                                    | SP         | 0.9091       |
|                                    | PPV        | 0.3846       |
|                                    | NPV        | 1            |
|                                    | LR+        | 11           |
| Abboud et al.(2019),TES/AR50%      | SS         | 1            |
|                                    | SP         | 0.8852       |
|                                    | PPV        | 0.2222       |
|                                    | NPV        | 1            |
|                                    | LR+        | 8.714        |
| Abboud et al.(2019),TES/THI>20%i   | SS         | 1            |
|                                    | SP         | 0.9303       |
|                                    | PPV        | 0.3200       |
|                                    | NPV        | 1            |
|                                    | LR+        | 14.352       |
| Boex et al.(2016), DCS & TES/AR50% | SS         | 1            |
|                                    | SP         | 0.9036       |

|                                                       |     |        |
|-------------------------------------------------------|-----|--------|
| <b>Byoun et al.(2019),TES/AR50%</b>                   | PPV | 0.5000 |
|                                                       | NPV | 1      |
|                                                       | LR+ | 10.375 |
|                                                       | SS  | 0      |
|                                                       | SP  | 1      |
| <b>Cedzich et al.(1996),DCS/MEP loss</b>              | PPV | N/A    |
|                                                       | NPV | 0.9739 |
|                                                       | LR+ | N/A    |
|                                                       | SS  | 0.6000 |
|                                                       | SP  | 0.8500 |
| <b>Choi et al. (2017),TES/AR50%,LAT10%</b>            | PPV | 0.5000 |
|                                                       | NPV | 0.8947 |
|                                                       | LR+ | 4.000  |
|                                                       | SS  | 0.3333 |
|                                                       | SP  | 0.9789 |
| <b>Dengler et al.(2013),TES/AR50%,LAT10%</b>          | PPV | 0.2000 |
|                                                       | NPV | 0.9894 |
|                                                       | LR+ | 15.833 |
|                                                       | SS  | 1      |
|                                                       | SP  | 1      |
| <b>Gempt et al.(2013),DCS/AR50%</b>                   | PPV | 1      |
|                                                       | NPV | 1      |
|                                                       | LR+ | N/A    |
|                                                       | SS  | 0.8000 |
|                                                       | SP  | 0.9167 |
| <b>Giampiccolo et al.(2021),DCS/AR50%,Upper limbs</b> | PPV | 0.6154 |
|                                                       | NPV | 0.9649 |
|                                                       | LR+ | 9.600  |
|                                                       | SS  | 0.4545 |
|                                                       | SP  | 0.8447 |
|                                                       | PPV | 0.3846 |

|                                                       |     |        |
|-------------------------------------------------------|-----|--------|
| <b>Giampiccolo et al.(2021),DCS/AR50%,Lower limbs</b> | NPV | 0.8788 |
|                                                       | LR+ | 2.926  |
|                                                       | SS  | 0.2308 |
|                                                       | SP  | 0.7556 |
|                                                       | PPV | 0.2143 |
|                                                       | NPV | 0.7727 |
| <b>Gogos et al.(2020),DCS,TES/AR20%</b>               | LR+ | 0.9441 |
|                                                       | SS  | 0.5000 |
|                                                       | SP  | 0.9123 |
|                                                       | PPV | 0.1667 |
|                                                       | NPV | 0.9811 |
|                                                       | LR+ | 5.700  |
| <b>Gogos et al.(2020)/MT5mA</b>                       | SS  | 0.5000 |
|                                                       | SP  | 0.7018 |
|                                                       | PPV | 0.0556 |
|                                                       | NPV | 0.9756 |
|                                                       | LR+ | 1.676  |
|                                                       | SS  | 0.2500 |
| <b>Greve et al.(2019),TES/AR50%</b>                   | SP  | 0.9701 |
|                                                       | PPV | 0.2000 |
|                                                       | NPV | 0.9774 |
|                                                       | LR+ | 8.375  |
|                                                       | SS  | 0.4348 |
|                                                       | SP  | 0.9847 |
| <b>Guo et al.(2021),TES/AR50%</b>                     | PPV | 0.7143 |
|                                                       | NPV | 0.9520 |
|                                                       | LR+ | 28.478 |
|                                                       | SS  | 1      |
|                                                       | SP  | 0.8571 |
|                                                       | PPV | 0.5000 |
| <b>Hatiboglu et al.(2010),DCS/MEP loss</b>            | NPV | 1      |

|                                              |     |        |
|----------------------------------------------|-----|--------|
| <b>Horiuchi et al.(2005),DCS/AR50%</b>       | LR+ | 7.000  |
|                                              | SS  | 1      |
|                                              | SP  | 1      |
|                                              | PPV | 1      |
|                                              | NPV | 1      |
| <b>Ichikawa et al.(2010),DCS/AR50%</b>       | LR+ | N/A    |
|                                              | SS  | 1      |
|                                              | SP  | 1      |
|                                              | PPV | 1      |
|                                              | NPV | 1      |
| <b>Kombos et al.(2009),TES/AR80%, LAT30%</b> | LR+ | N/A    |
|                                              | SS  | N/A    |
|                                              | SP  | 1      |
|                                              | PPV | N/A    |
|                                              | NPV | 1      |
| <b>Koo et al.(2019),TES/AR50%</b>            | LR+ | N/A    |
|                                              | SS  | N/A    |
|                                              | SP  | 1      |
|                                              | PPV | N/A    |
|                                              | NPV | 1      |
| <b>Lee et al.(2014),TES/AR50%,LAT10%</b>     | LR+ | N/A    |
|                                              | SS  | 0.5000 |
|                                              | SP  | 0.9487 |
|                                              | PPV | 0.4286 |
|                                              | NPV | 0.9610 |
| <b>Li et al.(2019),TES/AR50%</b>             | LR+ | 9.750  |
|                                              | SS  | 0.4643 |
|                                              | SP  | 0.9531 |
|                                              | PPV | 0.8125 |
|                                              | NPV | 0.8026 |
|                                              | LR+ | 9.904  |

|                                              |     |        |
|----------------------------------------------|-----|--------|
| <b>Majchrzak et al.(2018),TES/AR50%</b>      | SS  | 0.9091 |
|                                              | SP  | 0.9583 |
|                                              | PPV | 0.9091 |
|                                              | NPV | 0.9583 |
|                                              | LR+ | 21.818 |
| <b>Maruta et al.(2016),DCS,TES/AR50%</b>     | SS  | 0.1818 |
|                                              | SP  | 0.9784 |
|                                              | PPV | 0.2857 |
|                                              | NPV | 0.9619 |
|                                              | LR+ | 8.436  |
| <b>Moiyadi et al.(2018), DCS/AR30-50%</b>    | SS  | N/A    |
|                                              | SP  | 0.9615 |
|                                              | PPV | 0      |
|                                              | NPV | 1      |
|                                              | LR+ | N/A    |
| <b>Moiyadi et al.(2018), TES/AR50-80%</b>    | SS  | N/A    |
|                                              | SP  | 0.9231 |
|                                              | PPV | 0      |
|                                              | NPV | 1      |
|                                              | LR+ | N/A    |
| <b>Neuloh et al.(2004),DCS/AR50%, LAT10%</b> | SS  | 0.8571 |
|                                              | SP  | 0.8947 |
|                                              | PPV | 0.4615 |
|                                              | NPV | 0.9835 |
|                                              | LR+ | 8.142  |
| <b>Neuloh et al.(2007),DCS,TES/AR50%</b>     | SS  | 1      |
|                                              | SP  | 0.9125 |
|                                              | PPV | 0.5333 |
|                                              | NPV | 1      |
|                                              | LR+ | 11.428 |
| <b>Neuloh et al.(2009),DCS,TES/AR50</b>      | SS  | 0.7333 |

|                                                    |     |        |
|----------------------------------------------------|-----|--------|
|                                                    | SP  | 0.8750 |
|                                                    | PPV | 0.3333 |
|                                                    | NPV | 0.9747 |
|                                                    | LR+ | 5.866  |
| <b>Neuloh et al.(2010),DCS,TES/AR50%,LAT10-15%</b> | SS  | 1      |
|                                                    | SP  | 0.9259 |
|                                                    | PPV | 0.4545 |
|                                                    | NPV | 1      |
|                                                    | LR+ | 13.500 |
| <b>Obermueller et al.(2015),DCS/AR50%</b>          | SS  | 0.5789 |
|                                                    | SP  | 0.8993 |
|                                                    | PPV | 0.4400 |
|                                                    | NPV | 0.9398 |
|                                                    | LR+ | 5.748  |
| <b>Ostry et al.(2013)/ MT5mA</b>                   | SS  | 1      |
|                                                    | SP  | 0.6250 |
|                                                    | PPV | 0.1000 |
|                                                    | NPV | 1      |
|                                                    | LR+ | 2.666  |
| <b>Ostrý et al.(2013)/MT5mA &amp; MEP change</b>   | SS  | 0      |
|                                                    | SP  | 1      |
|                                                    | PPV | N/A    |
|                                                    | NPV | 0.9600 |
|                                                    | LR+ | N/A    |
| <b>Park et al.(2021),TES,AR50%</b>                 | SS  | 0.3333 |
|                                                    | SP  | 0.9936 |
|                                                    | PPV | 0.5000 |
|                                                    | NPV | 0.9873 |
|                                                    | LR+ | 52.166 |
| <b>Pastor et al.(2013),DCS,TES/AR50%,LAT10%</b>    | SS  | 1      |
|                                                    | SP  | 0.4444 |

|                                       |     |        |
|---------------------------------------|-----|--------|
| <b>Piñeiro et al.(2015),TES/AR50%</b> | PPV | 0.1667 |
|                                       | NPV | 1      |
|                                       | LR+ | 1.800  |
|                                       | SS  | 0.3333 |
|                                       | SP  | 1      |
|                                       | PPV | 1      |
| <b>Plans et al.(2017),DCS/AR50%</b>   | NPV | 0.7143 |
|                                       | LR+ | N/A    |
|                                       | SS  | 0.8889 |
|                                       | SP  | 0.9868 |
|                                       | PPV | 0.8889 |
|                                       | NPV | 0.9868 |
| <b>Plans et al.(2017),DCS/TH5mA</b>   | LR+ | 67.555 |
|                                       | SS  | 0      |
|                                       | SP  | 0.8421 |
|                                       | PPV | 0      |
|                                       | NPV | 0.8767 |
|                                       | LR+ | 0      |
| <b>Plans et al.(2017)/MT5mA</b>       | SS  | 0.6429 |
|                                       | SP  | 0.7042 |
|                                       | PPV | 0.3000 |
|                                       | NPV | 0.9091 |
|                                       | LR+ | 2.173  |
|                                       | SS  | 0.7778 |
| <b>Plans et al.(2017)/MT5mA+AR50%</b> | SP  | 1      |
|                                       | PPV | 1      |
|                                       | NPV | 0.9744 |
|                                       | LR+ | 0      |
|                                       | SS  | 0      |
|                                       | SP  | 0.9737 |
| <b>Plans et al.(2017)/MT5mA+TH5mA</b> | PPV | 0      |

|                                                   |     |        |
|---------------------------------------------------|-----|--------|
| <b>Sakurada et al.(2012),DCS/AR50%</b>            | NPV | 0.8916 |
|                                                   | LR+ | 0      |
|                                                   | SS  | 0.4000 |
|                                                   | SP  | 1      |
|                                                   | PPV | 1      |
| <b>Sasaki et al.(2014),DCS &amp; TES/MEP loss</b> | NPV | 0.8929 |
|                                                   | LR+ | N/A    |
|                                                   | SS  | 1      |
|                                                   | SP  | 1      |
|                                                   | PPV | 1      |
| <b>Seidel et al.(2013),DCS/TH4mA</b>              | NPV | 1      |
|                                                   | LR+ | N/A    |
|                                                   | SS  | 1      |
|                                                   | SP  | 0.9263 |
|                                                   | PPV | 0.4167 |
| <b>Seidel et al.(2013)/MT3mA</b>                  | NPV | 1      |
|                                                   | LR+ | 13.571 |
|                                                   | SS  | 0.6667 |
|                                                   | SP  | 0.7579 |
|                                                   | PPV | 0.0800 |
| <b>Seidel et al.(2013)/MT3mA+TH4mA</b>            | NPV | 0.9863 |
|                                                   | LR+ | 2.753  |
|                                                   | SS  | 0.6667 |
|                                                   | SP  | 0.9684 |
|                                                   | PPV | 0.4000 |
| <b>Seidel et al.(2020)/MT3mA</b>                  | NPV | 0.9892 |
|                                                   | LR+ | 21.111 |
|                                                   | SS  | 1      |
|                                                   | SP  | 0.6927 |
|                                                   | PPV | 0.0517 |
|                                                   | NPV | 1      |



|                                                      |     |        |
|------------------------------------------------------|-----|--------|
| <b>Senft et al.(2012),DCS,TES/AR50%,TH3mA,TH20mA</b> | LR+ | 3.200  |
|                                                      | SS  | 0.5000 |
|                                                      | SP  | 0.9000 |
|                                                      | PPV | 0.2857 |
|                                                      | NPV | 0.9574 |
| <b>Shiban et al.(2015),DCS/AR50%</b>                 | LR+ | 5.000  |
|                                                      | SS  | 1      |
|                                                      | SP  | 0.9231 |
|                                                      | PPV | 0.5000 |
|                                                      | NPV | 1      |
| <b>Shiban et al.(2015)/MT3mA</b>                     | LR+ | 13.000 |
|                                                      | SS  | 0      |
|                                                      | SP  | 1      |
|                                                      | PPV | N/A    |
|                                                      | NPV | 0.9286 |
| <b>Suess et al.(2006),DCS/AR50%,LAT5%,PW30%</b>      | LR+ | N/A    |
|                                                      | SS  | 0.8947 |
|                                                      | SP  | 0.9859 |
|                                                      | PPV | 0.8500 |
|                                                      | NPV | 0.9906 |
| <b>Suzuki et al.(2003),DCS/AR50%</b>                 | LR+ | 63.526 |
|                                                      | SS  | 1      |
|                                                      | SP  | 1      |
|                                                      | PPV | 1      |
|                                                      | NPV | 1      |
| <b>Szelényi et al.(2006),DCS,TES/AR50%</b>           | LR+ | N/A    |
|                                                      | SS  | 0.3333 |
|                                                      | SP  | 1      |
|                                                      | PPV | 1      |
|                                                      | NPV | 0.9643 |
|                                                      | LR+ | N/A    |

|                                                         |     |        |
|---------------------------------------------------------|-----|--------|
| <b>Szelényi et al.(2006),DCS,TES/TH20mA</b>             | SS  | 0.1667 |
|                                                         | SP  | 1      |
|                                                         | PPV | 1      |
|                                                         | NPV | 0.9558 |
|                                                         | LR+ | N/A    |
| <b>Szelényi et al.(2007),DCS,TES/AR50%,TH2mA,TH20mA</b> | SS  | 1      |
|                                                         | SP  | 0.8763 |
|                                                         | PPV | 0.1429 |
|                                                         | NPV | 1      |
|                                                         | LR+ | 8.083  |
| <b>Szelényi et al.(2010),TES/AR50%,TH20mA,TH100V</b>    | SS  | 0.7143 |
|                                                         | SP  | 0.5238 |
|                                                         | PPV | 0.3333 |
|                                                         | NPV | 0.8462 |
|                                                         | LR+ | 1.500  |
| <b>Takebayashi et al. (2014),DCS/MEP loss</b>           | SS  | 1      |
|                                                         | SP  | 1      |
|                                                         | PPV | 1      |
|                                                         | NPV | 1      |
|                                                         | LR+ | N/A    |
| <b>Weinzierl et al.(2007),TES/AR50%,LAT10%</b>          | SS  | N/A    |
|                                                         | SP  | 0.8333 |
|                                                         | PPV | 0      |
|                                                         | NPV | 1      |
|                                                         | LR+ | N/A    |
| <b>Yeon et al.(2010),TES/AR50%</b>                      | SS  | N/A    |
|                                                         | SP  | 1      |
|                                                         | PPV | N/A    |
|                                                         | NPV | 1      |
|                                                         | LR+ | N/A    |

|                                 |     |        |
|---------------------------------|-----|--------|
| Yue et al.(2014),TES/AR50%      | SS  | 0.3333 |
|                                 | SP  | 1      |
|                                 | PPV | 1      |
|                                 | NPV | 0.9524 |
|                                 | LR+ | N/A    |
| Zhou et al.(2017),DCS,TES/AR80% | SS  | 1      |
|                                 | SP  | 0.9275 |
|                                 | PPV | 0.1667 |
|                                 | NPV | 1      |
|                                 | LR+ | 0.5556 |

**Supplementary Table S5:** Diagnostic accuracy measures for transient postoperative motor deficits

| <u>Authors</u>                   | <u>DAM</u> | <u>Value</u> |
|----------------------------------|------------|--------------|
| Abboud et al.(2016),TES/THI>20%i | SS         | N/A          |
|                                  | SP         | 0.8602       |
|                                  | PPV        | 0            |
|                                  | NPV        | 1            |
|                                  | LR+        | N/A          |
| Abboud et al.(2019),TES/AR50%    | SS         | 0.8571       |
|                                  | SP         | 0.8776       |
|                                  | PPV        | 0.1667       |
|                                  | NPV        | 0.9954       |
|                                  | LR+        | 7.000        |
| Abboud et al.(2019),TES/THI>20%i | SS         | 1            |
|                                  | SP         | 0.9265       |
|                                  | PPV        | 0.2800       |

|                                               |     |        |
|-----------------------------------------------|-----|--------|
|                                               | NPV | 1      |
|                                               | LR+ | 13.611 |
| <b>Boex et al.(2016), DCS &amp; TES/AR50%</b> | SS  | 0.6000 |
|                                               | SP  | 0.8488 |
|                                               | PPV | 0.1875 |
|                                               | NPV | 0.9733 |
|                                               | LR+ | 3.969  |
| <b>Byoun et al.(2019),TES/AR50%</b>           | SS  | N/A    |
|                                               | SP  | 1      |
|                                               | PPV | N/A    |
|                                               | NPV | 1      |
|                                               | LR+ | N/A    |
| <b>Cedzich et al.(1996),DCS/MEP loss</b>      | SS  | 0      |
|                                               | SP  | 0.7143 |
|                                               | PPV | 0      |
|                                               | NPV | 0.7895 |
|                                               | LR+ | 0      |
| <b>Choi et al. (2017),TES/AR50%,LAT10%</b>    | SS  | 0.5000 |
|                                               | SP  | 0.9766 |
|                                               | PPV | 0.1000 |
|                                               | NPV | 0.9973 |
|                                               | LR+ | 21.333 |
| <b>Dengler et al.(2013),TES/AR50%,LAT10%</b>  | SS  | 0      |
|                                               | SP  | 0.9697 |
|                                               | PPV | 0      |
|                                               | NPV | 0.9697 |
|                                               | LR+ | 0      |
| <b>Gempt et al.(2013),DCS/AR50%</b>           | SS  | 0.3846 |
|                                               | SP  | 0.8596 |
|                                               | PPV | 0.3846 |
|                                               | NPV | 0.8596 |

|                                                       |     |        |
|-------------------------------------------------------|-----|--------|
| <b>Giampiccolo et al.(2021),DCS/AR50%,Upper limbs</b> | LR+ | 2.740  |
|                                                       | SS  | 0.2727 |
|                                                       | SP  | 0.8058 |
|                                                       | PPV | 0.2308 |
|                                                       | NPV | 0.8384 |
| <b>Giampiccolo et al.(2021),DCS/AR50%,Lower limbs</b> | LR+ | 1.404  |
|                                                       | SS  | 1      |
|                                                       | SP  | 0.8000 |
|                                                       | PPV | 0.2143 |
|                                                       | NPV | 1      |
| <b>Gogos et al.(2020),DCS,TES/AR20%</b>               | LR+ | 5.000  |
|                                                       | SS  | 0.5000 |
|                                                       | SP  | 0.9273 |
|                                                       | PPV | 0.3333 |
|                                                       | NPV | 0.9623 |
| <b>Gogos et al.(2020)/MT5mA</b>                       | LR+ | 6.875  |
|                                                       | SS  | 0.5000 |
|                                                       | SP  | 0.7091 |
|                                                       | PPV | 0.1111 |
|                                                       | NPV | 0.9512 |
| <b>Greve et al.(2019),TES/AR50%</b>                   | LR+ | 1.718  |
|                                                       | SS  | 0      |
|                                                       | SP  | 0.9624 |
|                                                       | PPV | 0      |
|                                                       | NPV | 0.9624 |
| <b>Guo et al.(2021),TES/AR50%</b>                     | LR+ | 0      |
|                                                       | SS  | 0.1111 |
|                                                       | SP  | 0.9529 |
|                                                       | PPV | 0.0714 |
|                                                       | NPV | 0.9705 |
|                                                       | LR+ | 2.359  |

|                                              |     |        |
|----------------------------------------------|-----|--------|
| <b>Horiuchi et al.(2005),DCS/AR50%</b>       | SS  | 0      |
|                                              | SP  | 0.9800 |
|                                              | PPV | 0      |
|                                              | NPV | 0.9423 |
|                                              | LR+ | 0      |
| <b>Kombos et al.(2009),TES/AR80%, LAT30%</b> | SS  | 0      |
|                                              | SP  | 1      |
|                                              | PPV | N/A    |
|                                              | NPV | 0.8667 |
|                                              | LR+ | N/A    |
| <b>Koo et al.(2019),TES/AR50%</b>            | SS  | 0      |
|                                              | SP  | 1      |
|                                              | PPV | N/A    |
|                                              | NPV | 0.9928 |
|                                              | LR+ | N/A    |
| <b>Lee et al.(2014),TES/AR50%,LAT10%</b>     | SS  | 0      |
|                                              | SP  | 0.9079 |
|                                              | PPV | 0      |
|                                              | NPV | 0.8961 |
|                                              | LR+ | 0      |
| <b>Li et al.(2019),TES/AR50%</b>             | SS  | 0.0952 |
|                                              | SP  | 0.9767 |
|                                              | PPV | 0.6667 |
|                                              | NPV | 0.6885 |
|                                              | LR+ | 4.095  |
| <b>Majchrzak et al.(2018),TES/AR50%</b>      | SS  | 0.1429 |
|                                              | SP  | 0.6429 |
|                                              | PPV | 0.0909 |
|                                              | NPV | 0.7500 |
|                                              | LR+ | 0.400  |
| <b>Maruta et al.(2012),DCS,TES/AR50%</b>     | SS  | 0      |

|                                              |     |        |
|----------------------------------------------|-----|--------|
|                                              | SP  | 1      |
|                                              | PPV | N/A    |
|                                              | NPV | 0.8636 |
|                                              | LR+ | N/A    |
| <b>Maruta et al.(2016),DCS,TES/AR50%</b>     | SS  | 0      |
|                                              | SP  | 0.9703 |
|                                              | PPV | 0      |
|                                              | NPV | 0.9703 |
|                                              | LR+ | 0      |
| <b>Moiyadi et al.(2018), DCS/AR30-50%</b>    | SS  | 0.3333 |
|                                              | SP  | 1      |
|                                              | PPV | 1      |
|                                              | NPV | 0.9200 |
|                                              | LR+ | N/A    |
| <b>Moiyadi et al.(2018), TES/AR50-80%</b>    | SS  | 0      |
|                                              | SP  | 0.9143 |
|                                              | PPV | 0      |
|                                              | NPV | 0.8889 |
|                                              | LR+ | 0      |
| <b>Neuloh et al.(2004),DCS/AR50%, LAT10%</b> | SS  | 0.1915 |
|                                              | SP  | 0.8300 |
|                                              | PPV | 0.3462 |
|                                              | NPV | 0.6860 |
|                                              | LR+ | 1.126  |
| <b>Neuloh et al.(2007),DCS,TES/AR50%</b>     | SS  | 0.3684 |
|                                              | SP  | 0.8841 |
|                                              | PPV | 0.4667 |
|                                              | NPV | 0.8356 |
|                                              | LR+ | 3.177  |
| <b>Neuloh et al.(2009),DCS,TES/AR50%</b>     | SS  | 0.3243 |
|                                              | SP  | 0.8636 |

|                                                    |     |        |
|----------------------------------------------------|-----|--------|
| <b>Neuloh et al.(2010),DCS,TES/AR50%,LAT10-15%</b> | PPV | 0.3636 |
|                                                    | NPV | 0.8418 |
|                                                    | LR+ | 2.378  |
|                                                    | SS  | 0.3333 |
|                                                    | SP  | 0.8875 |
| <b>Obermueller et al.(2015),DCS/AR50%</b>          | PPV | 0.1818 |
|                                                    | NPV | 0.9467 |
|                                                    | LR+ | 2.963  |
|                                                    | SS  | 0.0833 |
|                                                    | SP  | 0.8284 |
| <b>Ostrý et al.(2013)/ MT5mA</b>                   | PPV | 0.0800 |
|                                                    | NPV | 0.8346 |
|                                                    | LR+ | 0.4855 |
|                                                    | SS  | 0.4286 |
|                                                    | SP  | 0.6111 |
| <b>Ostrý et al.(2013)/MT5mA &amp; MEP change</b>   | PPV | 0.3000 |
|                                                    | NPV | 0.7333 |
|                                                    | LR+ | 1.102  |
|                                                    | SS  | 0.2500 |
|                                                    | SP  | 1      |
| <b>Park et al.(2021),TES,AR50%</b>                 | PPV | 1      |
|                                                    | NPV | 0.7391 |
|                                                    | LR+ | N/A    |
|                                                    | SS  | 0.5000 |
|                                                    | SP  | 0.9937 |
| <b>Pastor et al.(2013),DCS,TES/AR50%,LAT10%</b>    | PPV | 0.5000 |
|                                                    | NPV | 0.9937 |
|                                                    | LR+ | 78.750 |
|                                                    | SS  | 0.8000 |
|                                                    | SP  | 0.4400 |
|                                                    | PPV | 0.2222 |



|                                                   |     |        |
|---------------------------------------------------|-----|--------|
| <b>Sakurada et al.(2012),DCS/AR50%</b>            | NPV | 0.9167 |
|                                                   | LR+ | 1.428  |
|                                                   | SS  | 0      |
|                                                   | SP  | 0.9286 |
|                                                   | PPV | 0      |
|                                                   | NPV | 0.9286 |
| <b>Sasaki et al.(2014),DCS &amp; TES/MEP loss</b> | LR+ | 0      |
|                                                   | SS  | 0      |
|                                                   | SP  | 0.9884 |
|                                                   | PPV | 0      |
|                                                   | NPV | 0.9771 |
|                                                   | LR+ | 0      |
| <b>Seidel et al.(2013),DCS/TH4mA</b>              | SS  | 0.6667 |
|                                                   | SP  | 0.9149 |
|                                                   | PPV | 0.3333 |
|                                                   | NPV | 0.9773 |
|                                                   | LR+ | 7.833  |
|                                                   | SS  | 0.3333 |
| <b>Seidel et al.(2013)/MT3mA</b>                  | SP  | 0.7500 |
|                                                   | PPV | 0.0800 |
|                                                   | NPV | 0.9452 |
|                                                   | LR+ | 1.333  |
|                                                   | SS  | 0.3333 |
|                                                   | SP  | 0.9674 |
| <b>Seidel et al.(2013)/MT3mA+TH4mA</b>            | PPV | 0.4000 |
|                                                   | NPV | 0.9570 |
|                                                   | LR+ | 10.222 |
|                                                   | SS  | 0.7000 |
|                                                   | SP  | 0.7284 |
|                                                   | PPV | 0.2414 |
| <b>Seidel et al.(2020)/MT3mA</b>                  | NPV | 0.9516 |

|                                                      |     |        |
|------------------------------------------------------|-----|--------|
| <b>Senft et al.(2012),DCS,TES/AR50%,TH3mA,TH20mA</b> | LR+ | 2.812  |
|                                                      | SS  | 0.2857 |
|                                                      | SP  | 0.8936 |
|                                                      | PPV | 0.2857 |
|                                                      | NPV | 0.8936 |
| <b>Shiban et al.(2015),DCS/AR50%</b>                 | LR+ | 2.685  |
|                                                      | SS  | 0.2500 |
|                                                      | SP  | 0.9000 |
|                                                      | PPV | 0.5000 |
|                                                      | NPV | 0.7500 |
| <b>Shiban et al.(2015)/MT3mA</b>                     | LR+ | 2.500  |
|                                                      | SS  | 0      |
|                                                      | SP  | 1      |
|                                                      | PPV | N/A    |
|                                                      | NPV | 0.6923 |
| <b>Suess et al.(2006),DCS/AR50%,LAT5%,PW30%</b>      | LR+ | N/A    |
|                                                      | SS  | 0      |
|                                                      | SP  | 0.9074 |
|                                                      | PPV | 0      |
|                                                      | NPV | 0.9245 |
| <b>Suzuki et al.(2003),DCS/AR50%</b>                 | LR+ | 0      |
|                                                      | SS  | 0      |
|                                                      | SP  | 0.9904 |
|                                                      | PPV | 0      |
|                                                      | NPV | 0.9626 |
| <b>Szelényi et al.(2006),DCS,TES/AR50%</b>           | LR+ | 0      |
|                                                      | SS  | 0      |
|                                                      | SP  | 0.9810 |
|                                                      | PPV | 0      |
|                                                      | NPV | 0.9196 |
|                                                      | LR+ | 0      |

|                                                         |     |        |
|---------------------------------------------------------|-----|--------|
| <b>Szelényi et al.(2006),DCS,TES/TH20mA</b>             | SS  | 0      |
|                                                         | SP  | 0.9905 |
|                                                         | PPV | 0      |
|                                                         | NPV | 0.9204 |
|                                                         | LR+ | 0      |
| <b>Szelényi et al.(2007),DCS,TES/AR50%,TH2mA,TH20mA</b> | SS  | 1      |
|                                                         | SP  | 0.8854 |
|                                                         | PPV | 0.2143 |
|                                                         | NPV | 1      |
|                                                         | LR+ | 8.727  |
| <b>Takebayashi et al. (2014),DCS/MEP loss</b>           | SS  | 0      |
|                                                         | SP  | 0.9091 |
|                                                         | PPV | 0      |
|                                                         | NPV | 0.8696 |
|                                                         | LR+ | 0      |
| <b>Weinzierl et al.(2007),TES/AR50%,LAT10%</b>          | SS  | N/A    |
|                                                         | SP  | 0.8333 |
|                                                         | PPV | 0      |
|                                                         | NPV | 1      |
|                                                         | LR+ | N/A    |
| <b>Yeon et al.(2010),TES/AR50%</b>                      | SS  | 0      |
|                                                         | SP  | 1      |
|                                                         | PPV | N/A    |
|                                                         | NPV | 0.9898 |
|                                                         | LR+ | N/A    |
| <b>Yue et al.(2014),TES/AR50%</b>                       | SS  | N/A    |
|                                                         | SP  | 0.9767 |
|                                                         | PPV | 0      |
|                                                         | NPV | 1      |
|                                                         | LR+ | N/A    |

|                                        |     |        |
|----------------------------------------|-----|--------|
| <b>Zhou et al.(2017),DCS,TES/AR80%</b> | SS  | 0.5556 |
|                                        | SP  | 0.9836 |
|                                        | PPV | 0.8333 |
|                                        | NPV | 0.9375 |
|                                        | LR+ | 33.888 |

**Supplementary Table S6:** Diagnostic accuracy measures for early-transient postoperative motor deficits

| <u><b>Authors</b></u>                         | <u><b>DAM</b></u> | <u><b>Value</b></u> |
|-----------------------------------------------|-------------------|---------------------|
| <b>Abboud et al.(2016),TES/THI&gt;20%i</b>    | SS                | 1                   |
|                                               | SP                | 0.9412              |
|                                               | PPV               | 0.6154              |
|                                               | NPV               | 1                   |
|                                               | LR+               | 17.000              |
| <b>Abboud et al.(2019),TES/AR50%</b>          | SS                | 0.6667              |
|                                               | SP                | 0.8765              |
|                                               | PPV               | 0.1667              |
|                                               | NPV               | 0.9861              |
|                                               | LR+               | 5.400               |
| <b>Abboud et al.(2019),TES/THI&gt;20%i</b>    | SS                | 1                   |
|                                               | SP                | 0.9265              |
|                                               | PPV               | 0.2800              |
|                                               | NPV               | 1                   |
|                                               | LR+               | 13.611              |
| <b>Boex et al.(2016), DCS &amp; TES/AR50%</b> | SS                | 0.8333              |
|                                               | SP                | 0.8706              |
|                                               | PPV               | 0.3125              |

|                                                       |     |        |
|-------------------------------------------------------|-----|--------|
| <b>Giampiccolo et al.(2021),DCS/AR50%,Upper limbs</b> | NPV | 0.9867 |
|                                                       | LR+ | 6.439  |
|                                                       | SS  | 0.1579 |
|                                                       | SP  | 0.7830 |
|                                                       | PPV | 0.1154 |
|                                                       | NPV | 0.8384 |
| <b>Giampiccolo et al.(2021),DCS/AR50%,Lower limbs</b> | LR+ | 0.727  |
|                                                       | SS  | 0.4000 |
|                                                       | SP  | 0.7736 |
|                                                       | PPV | 0.1429 |
|                                                       | NPV | 0.9318 |
|                                                       | LR+ | 1.766  |
| <b>Hatiboglu et al.(2010),DCS/MEP loss</b>            | SS  | 0.1667 |
|                                                       | SP  | 0.7000 |
|                                                       | PPV | 0.2500 |
|                                                       | NPV | 0.5833 |
|                                                       | LR+ | 0.555  |
|                                                       | SS  | 0      |
| <b>Hiraishi et al.(2011),TES/AR50%</b>                | SP  | 1      |
|                                                       | PPV | N/A    |
|                                                       | NPV | 0.8571 |
|                                                       | LR+ | N/A    |
|                                                       | SS  | 0      |
|                                                       | SP  | 0.9474 |
| <b>Ichikawa et al.(2010),DCS/AR50%</b>                | PPV | 0      |
|                                                       | NPV | 0.9000 |
|                                                       | LR+ | 0      |
|                                                       | SS  | 0.1250 |
|                                                       | SP  | 1      |
|                                                       | PPV | 1      |
| <b>Irie et al.(2010),TES/AR50%,TH20mA</b>             | NPV | 0.9358 |

|                                                  |     |         |
|--------------------------------------------------|-----|---------|
| <b>Kang et al.(2013),TES/AR50%</b>               | LR+ | N/A     |
|                                                  | SS  | 1       |
|                                                  | SP  | 0.8529  |
|                                                  | PPV | 0.3750  |
|                                                  | NPV | 1       |
| <b>Lee et al.(2019),TES/AR50%,LAT10%</b>         | LR+ | 6.800   |
|                                                  | SS  | 0.2500  |
|                                                  | SP  | 0.9982  |
|                                                  | PPV | 0.5000  |
|                                                  | NPV | 0.9946  |
| <b>Moiyadi et al.(2018), DCS/AR30-50%</b>        | LR+ | 139.250 |
|                                                  | SS  | 0       |
|                                                  | SP  | 0.9545  |
|                                                  | PPV | 0       |
|                                                  | NPV | 0.8400  |
| <b>Moiyadi et al.(2018), TES/AR50-80%</b>        | LR+ | 0       |
|                                                  | SS  | 0.5000  |
|                                                  | SP  | 0.9459  |
|                                                  | PPV | 0.3333  |
|                                                  | NPV | 0.9722  |
| <b>Motoyama et al.(2011),DCS &amp; TES/AR50%</b> | LR+ | 9.250   |
|                                                  | SS  | 1       |
|                                                  | SP  | 1       |
|                                                  | PPV | 1       |
|                                                  | NPV | 1       |
| <b>Nakagawa et al.(2020),TES/AR50%</b>           | LR+ | N/A     |
|                                                  | SS  | 0.3000  |
|                                                  | SP  | 1       |
|                                                  | PPV | 1       |
|                                                  | NPV | 0.9565  |
|                                                  | LR+ | N/A     |

|                                                 |     |        |
|-------------------------------------------------|-----|--------|
| <b>Pastor et al.(2013),DCS,TES/AR50%,LAT10%</b> | SS  | N/A    |
|                                                 | SP  | 1      |
|                                                 | PPV | N/A    |
|                                                 | NPV | 1      |
|                                                 | LR+ | N/A    |
| <b>Piñeiro et al.(2015),TES/AR50%</b>           | SS  | N/A    |
|                                                 | SP  | 0.8750 |
|                                                 | PPV | 0      |
|                                                 | NPV | 1      |
|                                                 | LR+ | N/A    |
| <b>Plans et al.(2017),DCS/AR50%</b>             | SS  | 0      |
|                                                 | SP  | 0.8977 |
|                                                 | PPV | 0      |
|                                                 | NPV | 0.9518 |
|                                                 | LR+ | 0      |
| <b>Plans et al.(2017),DCS/TH5mA</b>             | SS  | 1      |
|                                                 | SP  | 0.9091 |
|                                                 | PPV | 0.3333 |
|                                                 | NPV | 1      |
|                                                 | LR+ | 11.000 |
| <b>Plans et al.(2017)/MT5mA</b>                 | SS  | 0.6667 |
|                                                 | SP  | 0.6854 |
|                                                 | PPV | 0.0667 |
|                                                 | NPV | 0.9839 |
|                                                 | LR+ | 2.119  |
| <b>Plans et al.(2017)/MT5mA+AR50%</b>           | SS  | 0      |
|                                                 | SP  | 0.9205 |
|                                                 | PPV | 0      |
|                                                 | NPV | 0.9529 |
|                                                 | LR+ | 0      |
| <b>Plans et al.(2017)/MT5mA+TH5mA</b>           | SS  | 0.5000 |

|                                        |     |        |
|----------------------------------------|-----|--------|
|                                        | SP  | 1      |
|                                        | PPV | 1      |
|                                        | NPV | 0.9778 |
|                                        | LR+ | N/A    |
| <b>Seidel et al.(2013),DCS/TH4mA</b>   | SS  | 0.1053 |
|                                        | SP  | 0.8765 |
|                                        | PPV | 0.1667 |
|                                        | NPV | 0.8068 |
|                                        | LR+ | 0.852  |
| <b>Seidel et al.(2013)/MT3mA</b>       | SS  | 0.2105 |
|                                        | SP  | 0.7342 |
|                                        | PPV | 0.1600 |
|                                        | NPV | 0.7945 |
|                                        | LR+ | 0.792  |
| <b>Seidel et al.(2013)/MT3mA+TH4mA</b> | SS  | 0.0526 |
|                                        | SP  | 0.9494 |
|                                        | PPV | 0.2000 |
|                                        | NPV | 0.8065 |
|                                        | LR+ | 1.039  |
| <b>Seidel et al.(2020)/MT3mA</b>       | SS  | 0.3939 |
|                                        | SP  | 0.6980 |
|                                        | PPV | 0.2241 |
|                                        | NPV | 0.8387 |
|                                        | LR+ | 1.304  |
| <b>Song et al.(2015),TES/AR50%</b>     | SS  | 0.3333 |
|                                        | SP  | 1      |
|                                        | PPV | 1      |
|                                        | NPV | 0.8000 |
|                                        | LR+ | N/A    |
| <b>Staarman et al.(2017),TES/AR50%</b> | SS  | 0.3333 |
|                                        | SP  | 1      |



|                                                      |     |        |
|------------------------------------------------------|-----|--------|
|                                                      | PPV | 1      |
|                                                      | NPV | 0.9848 |
|                                                      | LR+ | N/A    |
| <b>Szelényi et al.(2010),TES/AR50%,TH20mA,TH100V</b> | SS  | 0.7500 |
|                                                      | SP  | 0.5500 |
|                                                      | PPV | 0.4000 |
|                                                      | NPV | 0.8462 |
|                                                      | LR+ | 1.666  |
| <b>Yue et al.(2014),TES/AR50%</b>                    | SS  | 0      |
|                                                      | SP  | 0.9762 |
|                                                      | PPV | 0      |
|                                                      | NPV | 0.9762 |
|                                                      | LR+ | 0      |

#### Abbreviations for Supplementary Tables S3,S4,S5 and S6

**AR:** Amplitude criterion; **DCS:** Direct Cortical Stimulation; **i:**ipsilateral; **LAT:** Latency criterion; **LR+:**Positive Likelihood Ratio; **MEP:** Motor Evoked Potential ; **MT:** Motor Threshold/Mapping criterion; **NaN:** Not available ; **NPV:** Negative Predictive Value; **PPV:** Positive Predictive Value ; **PW:** Pulse Width; **SS:** Sensitivity; **SP:** Specificity ; **TES:** Transcranial Electrical Stimulation; **TH:** Threshold criterion

**Supplementary Table S7:** The table summarizes the relative rates of all motor deficits as well as the total number of early-transient, transient and permanent motor deficits in conjunction with MEP changes.

| <b>Authors</b>                        | <b>No of all new motor deficits/<br/>Total no of patients(%)</b> | <b>No of early-transient motor deficits/ No of all MEP changes(%)</b> | <b>No of transient motor deficits/ No of all MEP changes(%)</b> | <b>No of permanent motor deficits/ No of all MEP changes(%)</b> |
|---------------------------------------|------------------------------------------------------------------|-----------------------------------------------------------------------|-----------------------------------------------------------------|-----------------------------------------------------------------|
| <b>TUMORS AND OTHER BRAIN LESIONS</b> |                                                                  |                                                                       |                                                                 |                                                                 |
| Giampiccolo et al.(2021)              | <b>50%</b>                                                       | <b>12%</b>                                                            | <b>23%</b>                                                      | <b>38%</b>                                                      |
|                                       | <b>17%</b>                                                       | <b>14%</b>                                                            | <b>21%</b>                                                      | <b>21%</b>                                                      |
| Gogos et al.(2020)                    | <b>10%</b>                                                       | <b>N/A</b>                                                            | <b>33%</b>                                                      | <b>17%</b>                                                      |
| Mammadkhanli et al. (2020)            | <b>N/A</b>                                                       | <b>N/A</b>                                                            | <b>N/A</b>                                                      | <b>N/A</b>                                                      |
| Abboud et al.(2019)                   | <b>35%</b>                                                       | <b>18%</b>                                                            | <b>18%</b>                                                      | <b>22%</b>                                                      |
| Majchrzak et al.(2018)                | <b>51%</b>                                                       | <b>N/A</b>                                                            | <b>39%</b>                                                      | <b>61%</b>                                                      |
| Moiyadi et al.(2018)                  | <b>18%</b>                                                       | <b>0%</b>                                                             | <b>33%</b>                                                      | <b>0%</b>                                                       |
| Plans et al. (2017)                   | <b>20%</b>                                                       | <b>19%</b>                                                            | <b>0%</b>                                                       | <b>38%</b>                                                      |
| Zhou et al.(2017)                     | <b>14%</b>                                                       | <b>N/A</b>                                                            | <b>83%</b>                                                      | <b>17%</b>                                                      |
| Abboud et al.(2016)                   | <b>13%</b>                                                       | <b>N/A</b>                                                            | <b>62%</b>                                                      | <b>38%</b>                                                      |
| Boex et al.(2016)                     | <b>21%</b>                                                       | <b>31%</b>                                                            | <b>19%</b>                                                      | <b>50%</b>                                                      |
| Obermueller et al.(2015)              | <b>27%</b>                                                       | <b>N/A</b>                                                            | <b>15%</b>                                                      | <b>13%</b>                                                      |

|                        |       |     |     |     |
|------------------------|-------|-----|-----|-----|
| Shiban et al.(2015)    | 38%   | N/A | 67% | 33% |
| Lee et al. (2014)      | 17%   | N/A | 0%  | 43% |
| Gempt et al.(2013)     | 33%   | N/A | 33% | 48% |
| Ostrý et al. (2013)    | 32%   | N/A | 67% | 0%  |
| Pastor et al.(2013)    | 27%   | N/A | 33% | 25% |
| Seidel et al.(2013)    | 30%   | 23% | 20% | 17% |
| Sakurada et al.(2012)  | 23%   | N/A | 25% | 50% |
| Senft et al.(2012)     | 20%   | N/A | 57% | 29% |
| Hatiboglu et al.(2010) | 50%   | N/A | N/A | N/A |
| Ichikawa et al.(2010)  | 14%   | N/A | 40% | 20% |
| *Szelényi et al.(2010) | 54%   | 30% | N/A | 26% |
| Kombos et al.(2009)    | 13.3% | N/A | 40% | 0%  |
| Neuloh et al.(2009)    | 27%   | N/A | 37% | 14% |
| Neuloh et al.(2007)    | 31%   | N/A | 46% | 20% |
| Suess et al.(2006)     | 15%   | N/A | 13% | 36% |
| *Neuloh et al.(2004)   | 42%   | N/A | 39% | 22% |
| Kombos et al.(2001)    | 11%   | N/A | 0%  | 17% |

|                          |      |     |      |     |
|--------------------------|------|-----|------|-----|
| Zhou et al.<br>(2001)    | 16%  | N/A | N/A  | N/A |
| Cedzich et al.(1996)     | 36%  | N/A | 27%  | 27% |
| <b>EPILEPSY SURGERY</b>  |      |     |      |     |
| Koo et al.<br>(2019)     | 0.7% | N/A | 0.7% | 0%  |
| Neuloh et al.(2010)      | 13%  | N/A | 19%  | 16% |
| <b>ANEURYSM CLIPPING</b> |      |     |      |     |
| Guo et al.(2021)         | 11%  | N/A | 10%  | 25% |
| Park et al.(2021)        | 3%   | N/A | 25%  | 17% |
| You et al.(2021)         | 12%  | N/A | N/A  | N/A |
| Kameda et al.(2020)      | 5%   | 50% | 0%   | 0%  |
| Byoun et al.(2019)       | 3%   | N/A | 0%   | 40% |
| Greve et al.(2019)       | 7%   | N/A | 8%   | 15% |
| Li et al.<br>(2019)      | 57%  | 3%  | 23%  | 30% |
| Choi et al.(2017)        | 2%   | N/A | 10%  | 20% |
| Komatsu et al.<br>(2017) | 0%   | 0%  | 0%   | 0%  |
| Staarman et al.(2017)    | 2%   | 20% | N/A  | N/A |
| Kim et al.(2016)         | 5%   | N/A | N/A  | N/A |

|                           |     |     |     |     |
|---------------------------|-----|-----|-----|-----|
| Maruta et al.(2016)       | 7%  | N/A | 7%  | 10% |
| Song et al.(2015)         | 27% | 50% | N/A | N/A |
| Sasaki et al.(2014)       | 3%  | N/A | 5%  | 9%  |
| Takebayashi et al. (2014) | 20% | N/A | 32% | 21% |
| Yue et al.(2014)          | 9%  | 7%  | 0%  | 13% |
| *Dengler et al.(2013)     | 6%  | N/A | 7%  | 7%  |
| Kang et al.(2013)         | 8%  | 38% | N/A | N/A |
| Maruta et al.(2012)       | 14% | N/A | 50% | 0%  |
| Shi et al.(2012)          | N/A | N/A | 0%  | 33% |
| Motoyama et al. (2011)    | 2%  | 20% | N/A | N/A |
| Irie et al. (2010)        | 7%  | 33% | N/A | N/A |
| Yeon et al.(2010)         | 1%  | N/A | 8%  | 0%  |
| *Szelényi et al.(2007)    | 5%  | N/A | 14% | 9%  |
| Weinzierl et al.(2007)    | 0%  | N/A | 0%  | 0%  |
| Szelényi et al.(2006)     | 13% | N/A | 17% | 50% |
| Horiuchi et al.(2005)     | 8%  | N/A | 30% | 10% |
| Suzuki et al. (2003)      | 5%  | N/A | 20% | 5%  |

| ENDOVASCULAR PROCEDURES FOR ANEURYSMS |      |     |     |     |
|---------------------------------------|------|-----|-----|-----|
| Nakagawa et al.(2020)                 | 6%   | 43% | N/A | N/A |
| Wilent et al.(2020)                   | 2%   | 24% | N/A | N/A |
| Lee et al.(2019)                      | 0.7% | 14% | N/A | N/A |
| Piñeiro et al.(2015)                  | 38%  | N/A | 0%  | 50% |
| Hiraishi et al.(2011)                 | 14%  | 33% | N/A | N/A |

**Supplementary Table S8:** Causes of injury in tumor patients with permanent motor deficits

| Authors                  |            | Mechanical Injury | Vascular injury           | Unclear nature of the injury |
|--------------------------|------------|-------------------|---------------------------|------------------------------|
| Gogos et al.(2020)       |            | -                 | 2/58 (3.4%) <sup>1)</sup> | -                            |
| Seidel et al.(2020)      |            | 3/182 (1.6%)      | 3/182 (1.6%)              | -                            |
| Plans et al. (2017)      |            | -                 | 1/92 (1.1%)               | 13/92( 14.1%)                |
| Boex et al.(2016)        |            | -                 | 5/104 (4.8%)              | -                            |
| Obermueller et al.(2015) | Glioma     | 4/105 (3.8%)      | 1/105 (1%)                | -                            |
|                          | Metastasis | 1/53 (1.9%)       | 1/53 (1.9%)               | -                            |
| Shiban et al.(2015)      |            | -                 | 1/14 (7.1%)               | -                            |
| Lee et al. (2014)        |            | -                 | 3/84 (3.6%) <sup>2)</sup> | -                            |
| Gempt et al.(2013)       |            | -                 | 8/70 (11.4%)              | 2/70 (2.9%)                  |
| Seidel et al.(2013)      |            | 3/100(3%)         | 2/100(2%)                 | -                            |
| Sakurada et al.(2012)    |            | -                 | 1/30 (3.3%)               | -                            |
| Hatiboglu et al.(2010)   |            | -                 | 1/16 (6.3%)               | 2/16 (12.5%)                 |
| Ichikawa et al.(2010)    |            | -                 | 1/21 (4.8%)               | -                            |
| Neuloh et al.(2010)      |            | 3/86 (3.5%)       | -                         | -                            |
| Szelényi et al.(2010)    |            | 15/25 (60%)       | 4/25 (16%)                | -                            |

|                                                                                                                                                                                                                                                                                                                                                                                                                                                                                    |               |              |           |
|------------------------------------------------------------------------------------------------------------------------------------------------------------------------------------------------------------------------------------------------------------------------------------------------------------------------------------------------------------------------------------------------------------------------------------------------------------------------------------|---------------|--------------|-----------|
| Neuloh et al.(2009)                                                                                                                                                                                                                                                                                                                                                                                                                                                                | -             | 2/191(1%)    | 2/191(1%) |
| Neuloh et al.(2007)                                                                                                                                                                                                                                                                                                                                                                                                                                                                | -             | 7/88(8%)     | -         |
| Suess et al.(2006)                                                                                                                                                                                                                                                                                                                                                                                                                                                                 | 17/232 (7.3%) | 2/232 (0.9%) | -         |
| <b>Notes:</b><br><br>1)The authors also report about previous series with almost equal distribution of vascular and mechanical injuries ( in this previous series they applied Penfield stimulation without MEP monitoring and without monopolar short train mapping)<br>2) The authors stated they could only speculate on the cause<br><br>In the remaining 14 included tumor papers no specification about the type of injury that led to permanent motor deficit was described |               |              |           |
